# Supplementary material
Source: PubMed Central journal article supplement (PMC3124150)
Supplement: NIHMS304850-supplement-Supplement.pdf [file NIHMS304850-supplement-Supplement.pdf]

## Supporting Online Material

### MATERIALS AND METHODS

#### **Expression constructs, mutagenesis and cell lines**

The pcDNA3-Flag (-HA and-Myc) API2-MALT1 constructs were described previously (1, 2). For the API2-MALT1 fusion present in these constructs, the breakpoint for API2 corresponds to nucleotide 1323 of the cDNA sequence (AA residue 441), whereas the breakpoint for MALT1 corresponds to nucleotide 649 of the cDNA sequence (AA residue 217). These specific breakpoints represent the majority of clinically observed API2-MALT1 fusions (3). The resulting fusion protein contains three API2 BIR domains, one MALT1 Ig-like domain and the MALT1 “caspase-like” domain. The expression plasmids pcDNA3-Flag-API2(1-441), pcDNA3-Flag-MALT1(324-813), pcDNA3-Flag-E46A/R48A-API2-MALT1, pcDNA3-Flag-(D1-49)API2-MALT1, pcDNA3-Flag-(D1-98)API2-MALT1, pcDNA3-Flag-(D1-166)API2-MALT1, pcDNA3-HA-MALT1, pcDNA3-Myc-Bcl10, pcDNA3-Flag-API2-MALT1(1-762) and pcDNA3-Flag-API2-MALT1(1-700) were constructed as described previously (1, 2, 4). pcDNA-Flag-p100 and pcDNA3-HA/Flag-NIK were provided by Dr. Gabriel Nunez. Point mutants of API2-MALT1 (C678A) and NIK (KK429/430AA, R325A, R366A, and R368A) were prepared using the QuickChange XL Site-Directed Mutagenesis Kit (Stratagene, Cedar Creek, TX, USA). Expression constructs encoding NIK fragments (AAs 624-947, 1-325, and 326-947) were generated by polymerase chain reaction and then subcloned into the *Xba*I and *Apa*I sites of the corresponding pcDNA3 vector (Invitrogen, Carlsbad, CA, USA). NIK(624-947) is a dominant negative mutant that retains IKK $\alpha$  binding but lacks the kinase domain, and NIK KK429/430AA is a kinase-dead NIK dominant negative mutant. All DNA sequences were verified using an ABI Model 3730 automated sequencer.

HEK293T cells were obtained from American Type Culture Collection (ATCC, Manassas, VA, USA). The SSK41 lymphoma cell line with stable expression of A7M3, an API2-MALT1 fusion which contains three API2 BIR domains, two MALT1 Ig-like domains and the MALT1 “caspase-like” domain, has been previously described (5). BJAB B-cells that express API2-MALT1 or MALT1 from a tetracycline inducible promoter were generated as follows: First, a BJAB clone stably transfected with pTet-On (Clontech, Mountain View, CA, USA) was obtained from Dr. Rolf Renne (6). Next, these cells were transfected with pTRE2puro-Flag-API2-MALT1 or pTRE2puro-Flag-MALT1, and clones were selected for puromycin resistance and then screened for doxycycline-inducible expression of Flag-API2-MALT1 or Flag-MALT1 by Western blot.

#### **Cell Culture, Transfection, and RNA interference**

HEK293T cells were maintained in DMEM supplemented with 10% fetal bovine serum (FBS) according to standard procedures. A total of  $5 \times 10^5$  or  $1 \times 10^6$  HEK293T cells were transfected with indicated plasmids using either a calcium phosphate method or Lipofectamine 2000 (Invitrogen). BJAB cells were maintained at a concentration of 0.2 to 0.8 million cells/ml in RPMI 1640 with 10% FBS. Treatment with 1  $\mu$ g/mL of doxycycline (Sigma-Aldrich, St. Louis, MO, USA) was used to induce expression of API2-MALT1 or MALT1. For analysis of the effect of B-cell receptor stimulation in BJAB cells, all cells were first stimulated with 1  $\mu$ g/ml doxycycline for 24 hr, and then treated with or without 10  $\mu$ g/ml Goat anti-human IgM as indicated for 5 hr. All cells were cultured in the presence of 25  $\mu$ M MG132 for 5 hr prior to

harvest. SSK41 cells (7, 8) with stable expression of A7M3 were maintained in DMEM-F12 with 10% FBS plus 1  $\mu\text{g}/\text{mL}$  puromycin and 1.5  $\text{mg}/\text{mL}$  G418 as described (5).

API2-MALT1-expressing SSK41 and BJAB B-cells were electroporated with control, human NIK-specific, IKK $\alpha$ -specific or IKK $\beta$ -specific siRNAs (ON-TARGET plus SMART pools, L-003580-00, L-003473-00, and L-003503-00, respectively, Dharmacon, Lafayette, CO) using Amaxa Cell Line Nucleofactor Kit T (Lonza Cologne AG, Germany) and program G16. Cells were allowed to recover for 48 hrs prior to further analysis. In order to generate clones with stable knock-down of NIK, API2-MALT1-expressing SSK41 B-cells were infected with control or NIK shRNA lentiviral particles (Santa Cruz Biotechnology, Santa Cruz, CA, sc-3606065 or sc-108080) at an MOI of 1 on two consecutive days. Infected cells were selected by limiting dilution in 96-well plates, and resultant clones were screened by western blot and/or RT-PCR to assess NIK knock-down.

### **Immunoprecipitation, nuclear fractionation, and Western blot analysis**

Cells were harvested 24-48 hrs after transfection and lysed with RIPA buffer (Sigma-Aldrich) containing complete protease inhibitor (Roche Diagnostics, Mannheim, Germany). Immunoprecipitations were carried out using anti-FLAG antibody M2-Agarose (Sigma-Aldrich, #A2220) or anti-HA (Roche Laboratories, Basel, Switzerland, #11 583 816 001). The immunoprecipitated products were resolved by SDS-PAGE and detected by Western blotting using ECL Western Blotting Substrate (Thermo Scientific, Rockford, IL, USA, #32106) or Lumagen TMA-6 (GE Healthcare UK Ltd., Buckinghamshire, England) according to the manufacturer's instructions. Cytoplasmic and nuclear extracts were prepared using the NE-PER Nuclear and Cytoplasmic Extraction Reagents according to the manufacturer's recommendations (Thermo Scientific, Rockford, IL, USA). Purity of the nuclear extracts was confirmed by Western blot for HDAC1. The following antibodies were used for Western Blot: anti-Flag M2-peroxidase conjugate (Sigma-Aldrich, #A-8592), anti-Myc-HRP (Santa Cruz Biotechnology Inc., sc-40), anti-HA-HRP (Roche Laboratories, #11 667 475 5433), anti-HA (Roche Laboratories, #11 583 816 001), anti-p100/p52 (Cell Signaling Technology, Inc., Danvers, MA, USA, #4882), anti-RelB (Cell Signaling #4922), anti-NIK (Cell Signaling #4994, Santa Cruz Biotechnology #N-19, Santa Cruz Biotechnology #C-20), anti-MALT1 (9) or (Santa Cruz Biotechnology, H-300), anti-Bcl10 (Santa Cruz Biotechnology, sc-5611), anti-A20 (59A426, eBioscience, San Diego, CA, USA), anti-TRAF3 (Santa Cruz Biotechnology, sc-949), anti-IKK $\alpha$  (Santa Cruz Biotechnology, sc-949), anti-IKK $\beta$  (Santa Cruz Biotechnology, sc-7329-R), anti-Pim-2 (Santa Cruz Biotechnology, sc-13514), anti-phospho Serine 112-BAD (Cell Signaling # 9291), anti BAFF (Abcam, Cambridge, MA, ab65360), anti-GAPDH (Santa Cruz Biotechnology, 6C5), anti-HDAC1 monoclonal antibody (Santa Cruz Biotechnology Inc.), goat-anti-rabbit-HRP (Jackson Laboratories, West Grove, PA, USA, #111-035-046), goat-anti-mouse-HRP (Jackson Laboratories, # 115-035-071).

### **MALT1 protease assay**

As a source of recombinant MALT1 protein, HKB11 cells (Bayer Corporation, ATCC Number CRL-12568) were generated with stable expression of MALT1 fused to an N-terminal combined StrepII-Flag tag (IBA BioTagnology, Gottingen, Germany). Cells were grown in suspension in 293 serum free medium (Invitrogen NV, Merelbeke, Belgium). The StrepII-tagged MALT1 fusion protein was purified on Strep-Tactin columns according to the manufacturer's recommendations using the One-STrEP-tag purification kit (IBA BioTagnology). The MALT1

protease assay was performed in 25  $\mu$ l buffer (pH 6.8) consisting of 50 mM MES, 150 mM NaCl, 10% (w/v) sucrose, 0.1% (w/v) CHAPS, 10 mM dithiothreitol and 1 M  $(\text{NH}_4)_3\text{citrate}$ , supplemented with 100  $\mu$ M fluorogenic substrate (Ac-LSSR-AMC, Anaspec, Fremont, CA) and purified StrepII-tagged MALT1 fusion protein, with or without 100  $\mu$ M Ac-LSSR-CHO inhibitor. Time-dependent release of free amido-4-methylcoumarin (AMC) was measured on a FLUOstar Galaxy reader (BMG Labtechnologies GmbH, Offenburg, Germany), and activity was expressed as the increase of relative light units per minute per well.

### **NIK *in vitro* cleavage assay**

A vector enabling expression of biotinylated NIK (pcD-NIK-V5-bioC) was constructed by introducing oligonucleotides encoding the biotinylation (bio) sequence (GLNDIFEAQKIEWHE) as described (10) downstream of a C-terminal V5 epitope in the plasmid pcDNA3.1. The bio-immunoprecipitation method was performed as described (5) using paramagnetic streptavidin beads (Dynabeads M-280, Invitrogen). *In vitro* cleavage assays were performed in 50  $\mu$ l kosmotropic salt buffer [50 mM MES (pH 6.8), 150 mM NaCl, 10% (w/v) sucrose, 0.1% (w/v) CHAPS, 10 mM dithiothreitol and 1 M  $(\text{NH}_4)_3\text{citrate}$ ] in order to stabilize intermolecular interactions. Reactions were supplemented with streptavidin beads containing NIK-V5-bioC, StrepII/Flag-tagged MALT1, with or without 100  $\mu$ M Ac-LSSR-CHO inhibitor. After incubation at 37°C for 6 hrs with constant rotation, an aliquot of the reaction mixture was used for Western blotting with a Flag antibody to verify equal StrepII/Flag-MALT1 concentrations. The streptavidin beads were collected, washed with 1X PBS and boiled for 10 min in 1X SDS gel loading buffer (with a final concentration of 4% SDS and 300 mM  $\beta$ -mercaptoethanol) and western blotting was performed with the V5 antibody (sc-58052).

### **Dexamethasone-induced apoptosis assay**

Dexamethasone was serially diluted in complete RPMI growth medium at the indicated concentrations in white Cliniplates (Labsource, Willowbrook, IL). The SSK41 B cells were plated at 40,000 cells per well. After 48 hrs, cell viability was assessed using the Cell Titer-Glo Luminescent Cell Viability Assay (Promega, Madison, WI) according to the manufacturer's recommendations. Values are calculated as a percentage of control cells receiving no treatment. P values were derived using a two-tailed T test.

### **B-cell adhesion assay**

Adhesion assays were performed as described (11, 12). Briefly, BJAB B-cells with stable, doxycycline-inducible expression of Flag-API2-MALT1, or empty vector control BJAB cells were electroporated with control or NIK siRNA, followed by doxycycline treatment.  $5 \times 10^5$  cells were applied to 12 well plates (Becton-Dickinson) coated with BSA or VCAM-1, and then allowed to adhere for 30 min at 37°C. Plates were prepared by incubating for one hour at 37°C with 3  $\mu$ g/ml VCAM-1 (R & D systems). Nonadherent cells were removed by washing with PBS. Three representative fields were then counted under 20X magnification. Adhesion was calculated as a % of input samples counted before washing. Each condition was performed in triplicate wells.

### **Quantitative RT-PCR Gene Expression Analyses**

Control and API2-MALT1-expressing SSK41 cells were harvested and total RNA was then prepared using the RNeasy Mini Kit (Qiagen). Equivalent amounts of RNA (500-1000 ng)

were used for cDNA synthesis with the Superscript First-Strand Synthesis System (Invitrogen) using oligo dT primers. Quantitative PCR was performed using TaqMan gene expression primers (Applied Biosystems) specific for human CXCR4, Pim-2, BAFF and integrin  $\alpha$ L on an Applied Biosystems 7900HT apparatus supplied by the University of Michigan Microarray Core Facility. Cycle Thresholds were determined and normalized with those for reactions performed with GAPDH specific TaqMan primers. For each gene, relative expression was determined, setting a value of 1.0 for expression in control SSK41 cells. P values were derived using a two tailed T test.

### **Analysis of primary MALT lymphoma specimens**

Cases of MALT lymphoma with known chromosomal translocation status were investigated by Western blot with anti-NIK, anti-p100/p52, and anti-C-terminal MALT1 antibody. The p52/p100 ratio was quantified by standard densitometric analysis. The use of archival human tissues for research was approved by the local research ethics committees of the authors' institutions.

Gene expression microarray analysis of two completely separate collections of MALT lymphoma tumor specimens was performed in order to determine if noncanonical NF- $\kappa$ B target genes are upregulated in tumors expressing API2-MALT1. Collection #1 included nine t(11;18)-positive (8 from the stomach and 1 from lung) and eight t(11;18)-negative MALT lymphomas (all from the stomach). A description of these patient materials and the methodology for gene expression microarray analysis with Affymetrix GeneChip HG-U133A was detailed in a previous study (13) (GEO; <http://www.ncbi.nlm.nih.gov/geo/>, GSE16024). Standard normalization and nonspecific filtering were carried out. As described previously, absolute GSEA was carried out to investigate whether NF- $\kappa$ B target genes were differentially expressed between t(11;18) positive and translocation negative MALT lymphoma. The NF- $\kappa$ B target genes were collated from online data base (<http://www.nf-kb.org>), published works (<http://bioinfo.lifl.fr/NF-KB>, <http://people.bu.edu/gilmore/nf-kb/target/index.html>) and careful bioinformatic search (Table S1), and those that are transactivated by the non-canonical NF- $\kappa$ B pathway were identified according to previous investigations (11, 14-21). The significance of the GSEA results was assessed by statistical analyses (the nominal P value and False Discovery Rate). Leading edge analysis was further performed to identify the biologically important gene subset.

Tumor collection #2 includes 6 t(11;18)-positive and 8 t(11;18)-negative MALT lymphomas and the methods used for tissue sample collection, RNA isolation and reverse transcription have been described previously (22). Five micrograms of RNA were biotin-labeled and hybridized onto human oligonucleotide microarrays (Affymetrix HG-U133 Plus 2.0; Affymetrix, High Wycombe, UK). Data were analyzed using R/Bioconductor.

### **Statistical Analysis**

Data are expressed as mean  $\pm$  SEM. Differences between groups were compared for significance using paired or unpaired 2-tailed Student's T tests, as appropriate, with the assistance of GraphPad InStat software. P values of less than 0.05 were considered statistically significant. See above sections and figure legends for statistical methods used to analyze gene expression in patient samples.

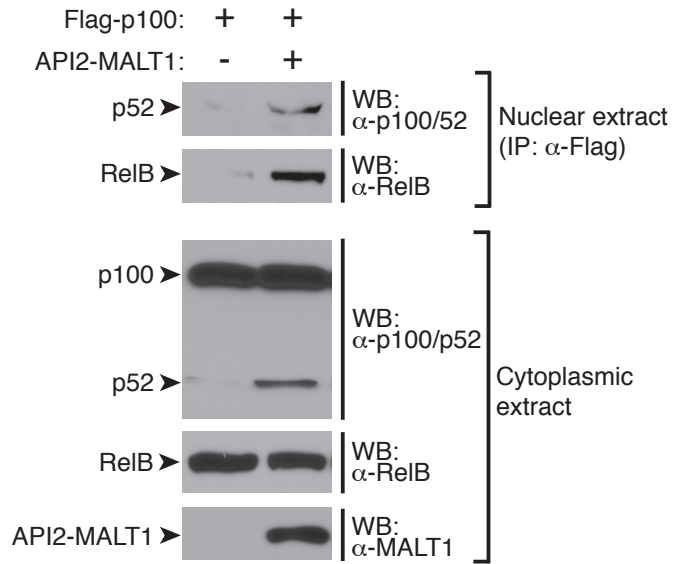

**Fig. S1. *API2-MALT1* expression results in the formation of p52/RelB dimers in the nucleus.** HEK293T cells were transfected as indicated, and nuclear extracts were prepared. The ability of endogenous RelB to co-immunoprecipitate with nuclear p52 was assessed by Western blot. Data are representative of at least three separate experiments.

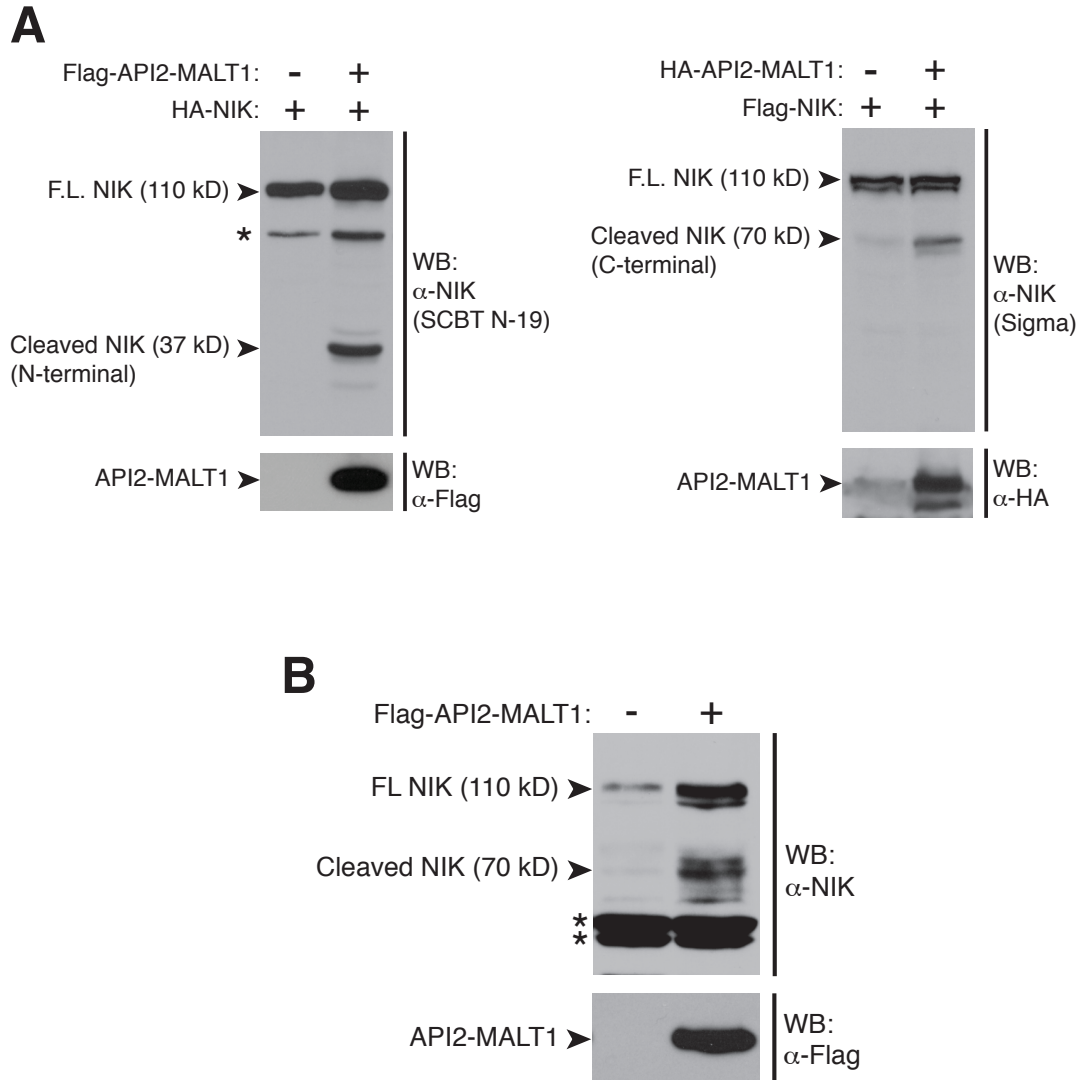

**Fig. S2. API2-MALT1-dependent cleavage of NIK into 37 kD and 70 kD proteolytic fragments. (A)** Additional antibodies confirm generation of N-terminal and C-terminal NIK fragments. *Left panel:* Western analysis using an antibody raised against the N-terminal portion of NIK and thereby recognizes only the 37 kD cleavage fragment. *Right panel:* Western analysis using an antibody raised against the C-terminal portion of NIK and thereby recognizes only the 70 kD cleavage fragment. **(B)** Cleavage of endogenous NIK by API2-MALT1. HEK293T cells were transfected with API2-MALT1, and endogenous NIK was detected by Western blot. Of note, we were able to detect endogenous NIK in HEK293T cells only when experiments were carried out in the presence of the proteasome inhibitor, MG132, consistent with the fact that NIK is highly unstable due to constitutive proteasomal degradation. Interestingly, in HEK293T cells treated with MG132, we observed that levels of endogenous NIK are enhanced upon expression of API2-MALT1. This implies that in addition to inducing NIK cleavage, expression of API2-MALT1 in these cells may also stimulate endogenous NIK production or enhance NIK stability via a mechanism other than inhibiting proteasome-dependent degradation. \* = nonspecific band.

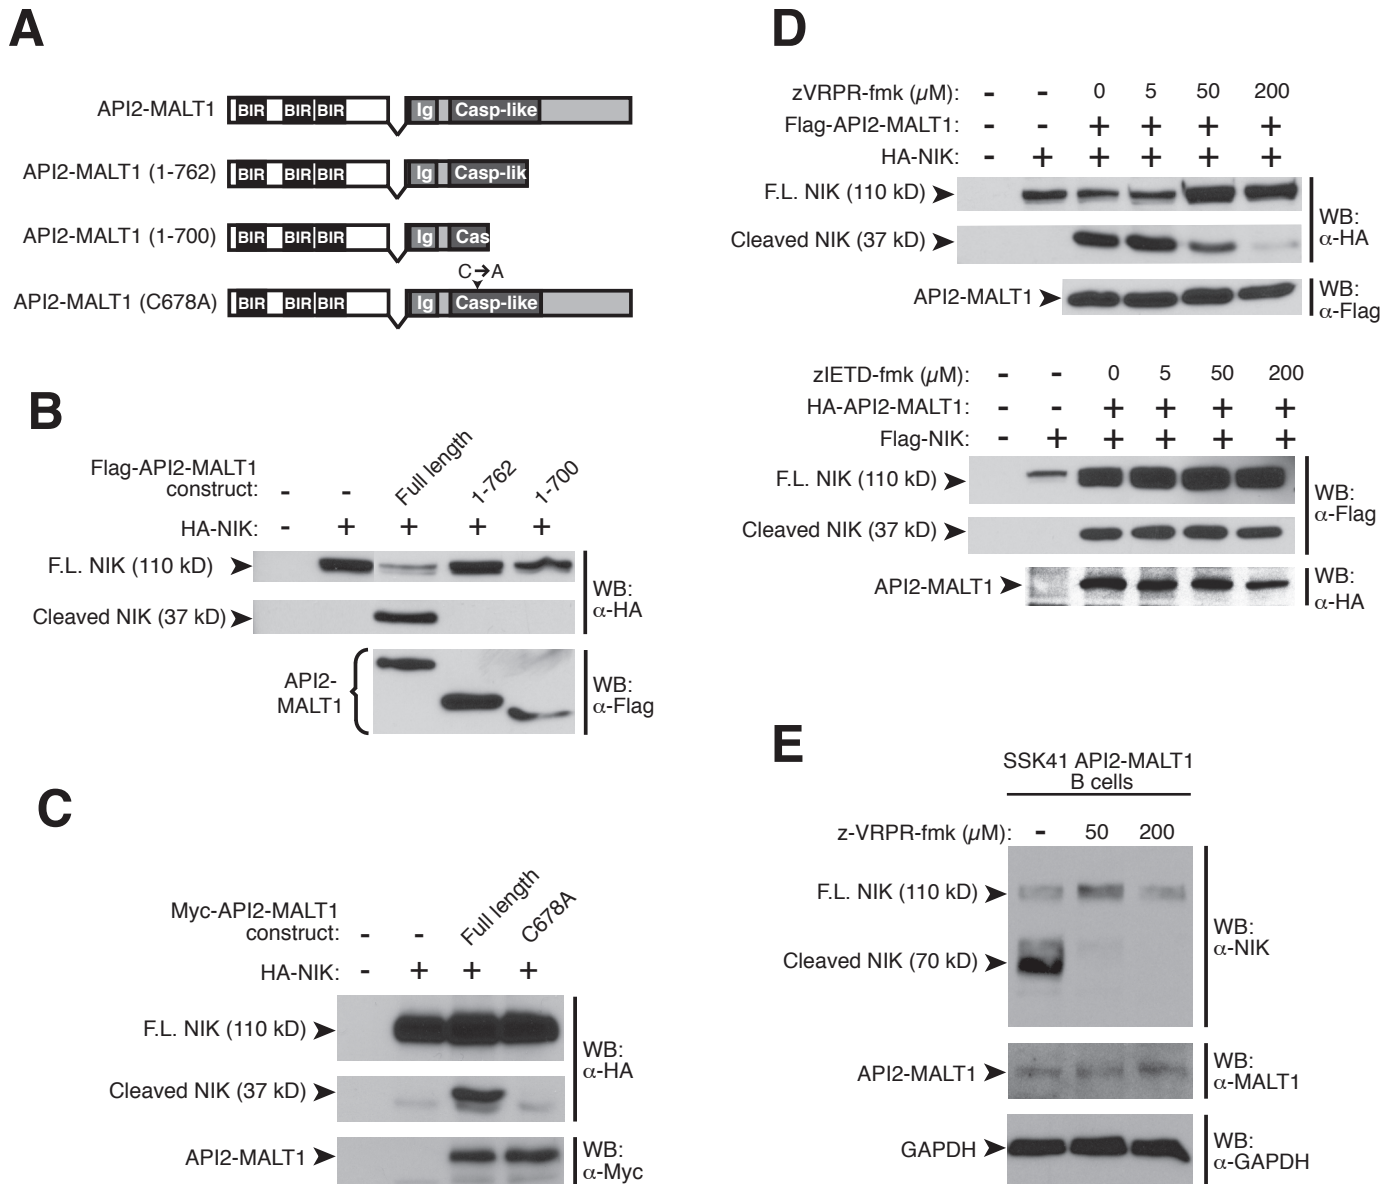

**Fig. S3. Deletion, mutation, or inhibition of the MALT1 “caspase-like” domain results in loss of API2-MALT1-dependent NIK cleavage.** (A) Schematic of API2-MALT1 mutants. (B) HEK293T cells were transfected with HA-NIK along with various Flag-tagged API2-MALT1 proteins as indicated. The 37 kD N-terminal NIK cleavage fragment was detected by Western blotting with α-HA. (C) HEK293T cells were transfected with either wild-type API2-MALT1 or API2-MALT1(C678A) mutant, along with HA-NIK as indicated. Western blot with α-HA was performed to detect full-length NIK and the 37 kD N-terminal NIK fragment. (D and E) HEK293T cells (D) or SSK41 cells (E) expressing API2-MALT1 were incubated with zVRPR-fmk or zIETD-fmk, and the NIK cleavage fragment was detected by Western blot. Data are representative of at least three separate experiments.

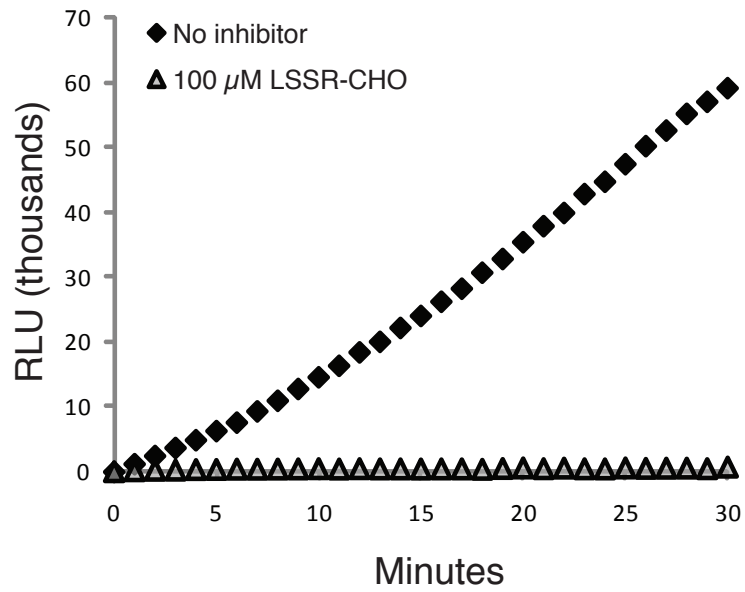

**Fig. S4. *MALT1* protease activity assay.** Fluorescence release (RLU) due to Ac-LSSR-AMC substrate cleavage (100 μM) in vitro by StrepII-tagged MALT1 (◆). Addition of Ac-LSSR-CHO (100 μM) inhibits MALT1 proteolytic activity (▲).



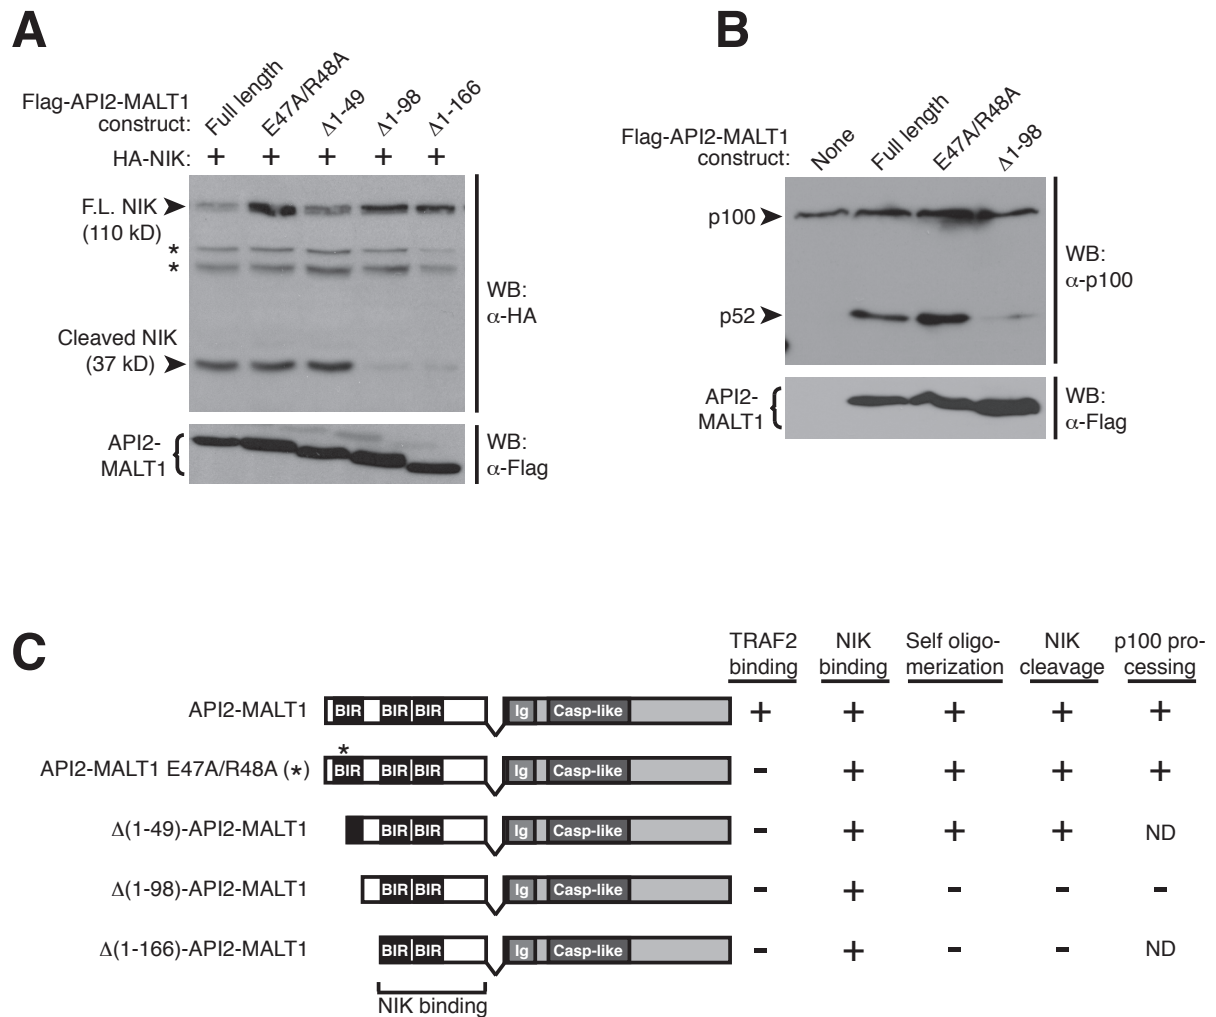

**Fig. S5. The API2 moiety is required for association with and cleavage of NIK.** (A) The API2-MALT1 auto-oligomerization domain, but not the TRAF2-binding domain, is required for NIK cleavage. HEK293T cells were transfected with HA-NIK, along with the indicated API2-MALT1 deletion mutants, and the generation of the 37 kD N-terminal NIK cleavage product was assessed by Western blotting with  $\alpha$ -HA. Mutation or deletion of the previously identified TRAF2 binding site within BIR1 of the API2 moiety (E47A/R48A or  $\Delta 1-49$  mutants) does not prevent API2-MALT1-dependent NIK cleavage. In contrast, deletion of the C-terminal half of BIR1 ( $\Delta 1-98$ ), a region that mediates auto-oligomerization of API2-MALT1, does impede API2-MALT1-induced NIK cleavage. (B) API2-MALT1 mutants that lack the ability to bind and cleave NIK are unable to promote p100 processing to p52. HEK293T cells were transfected with the indicated API2-MALT1 mutants and processing of endogenous p100 was analyzed by Western blotting. (C) Schematic summary of the activities of various API2-MALT1 mutants. Results suggest that the API2 moiety of API2-MALT1 interacts with NIK via a site located C-terminal to the BIR1 domain (see Fig. 2F), and that API2 moiety-mediated auto-oligomerization is required to achieve efficient API2-MALT1-dependent NIK cleavage and p100 processing. ND= Not Determined.

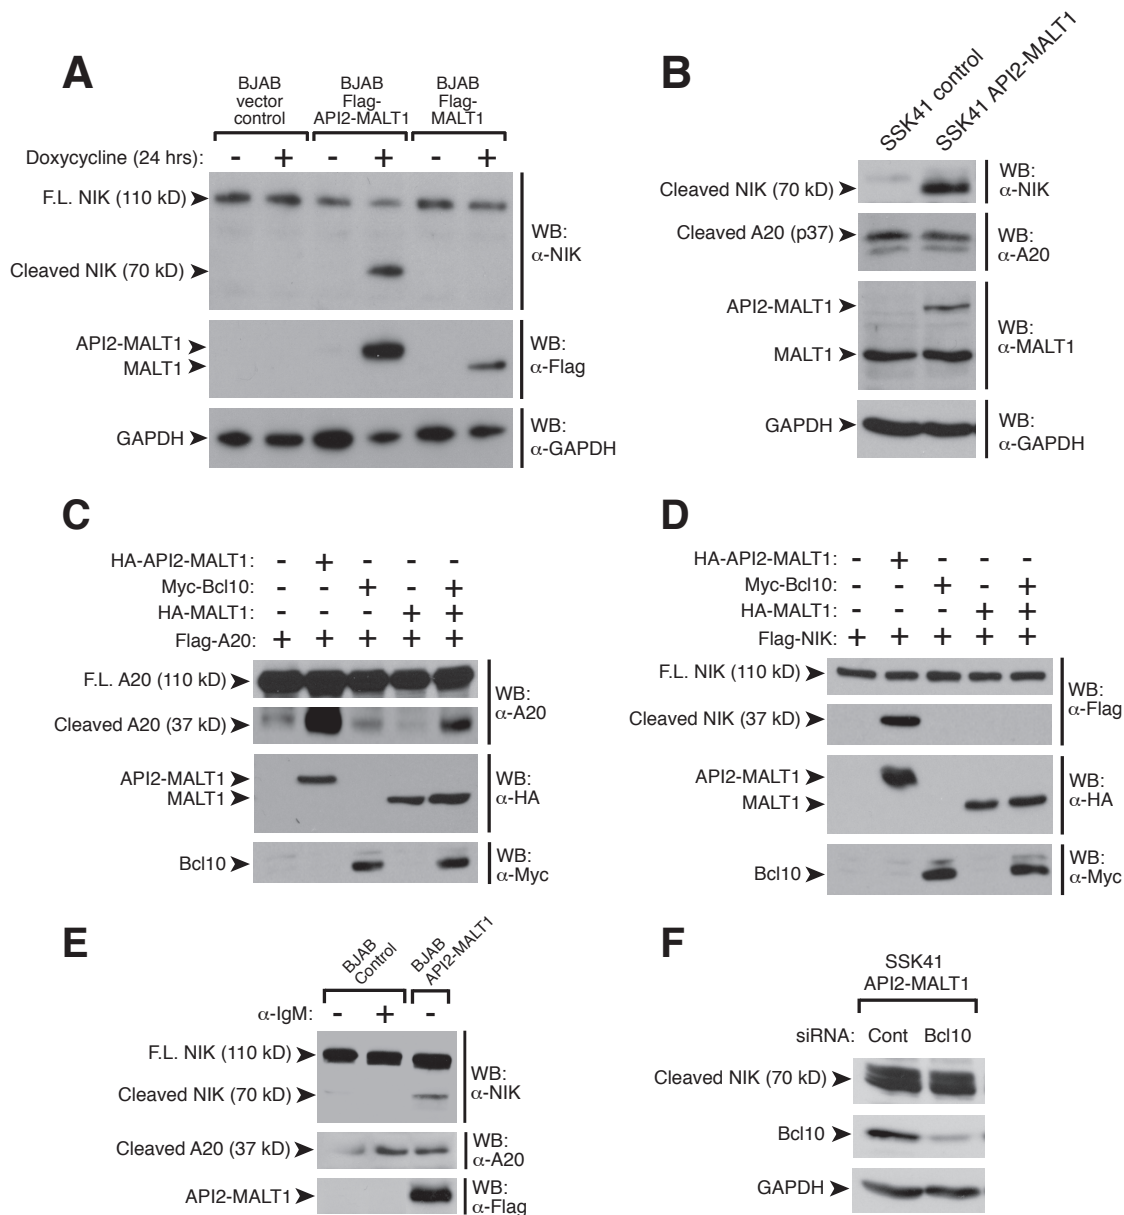

**Fig. S6. Activation of wild-type MALT1 within the cell does not induce the cleavage of NIK.** (A) BJAB B-cells expressing API2-MALT1 or MALT1 from a tetracycline inducible promoter were treated with or without doxycycline and analyzed for NIK cleavage by Western blot. (B) Unlike A20, NIK is not cleaved in SSK41 cells in the absence of API2-MALT1. Control cells or cells stably expressing API2-MALT1 were analyzed for the presence of the endogenous 70 kD C-terminal NIK cleavage fragment and 37 kD A20 C-terminal cleavage fragment by Western blot. (C and D) Co-expression of Bcl10 and MALT1 activates the MALT1 protease, but does not result in cleavage of NIK. HEK293T cells were transfected with A20 (C) or NIK (D), along with other indicated proteins, and the generation of the A20 (C) or NIK (D) cleavage product was assessed by Western blot. (E) B-cell receptor stimulation activates the MALT1 protease, but does not result in cleavage of NIK. Empty vector control or API2-MALT1-expressing BJAB cells were treated with or without anti-IgM as indicated, and the generation of endogenous cleaved NIK or A20 was detected by Western blot. (F) Bcl10 is not required for API2-MALT1-dependent NIK cleavage. API2-MALT1-expressing SSK41 cells were treated with control or Bcl10-specific siRNA. Bcl10 knock-down and NIK cleavage was then assessed by Western blot. Data are representative of at least three separate experiments.

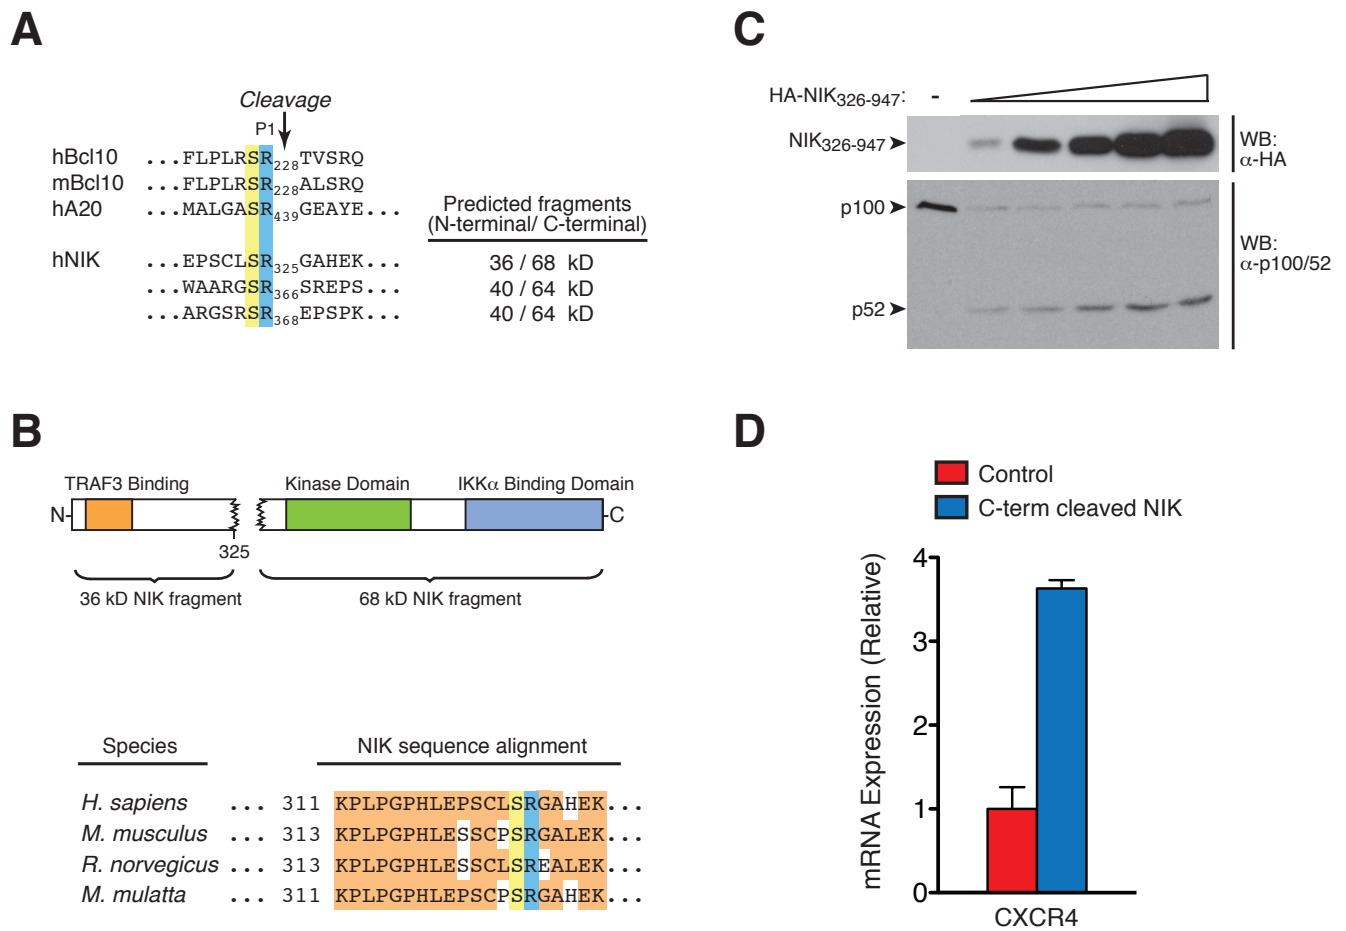

**Fig. S7. The 70 kD C-terminal NIK cleavage fragment induces noncanonical NF- $\kappa$ B signaling.** (A) Alignment of the MALT1 cleavage sites in Bcl10 and A20 with candidate sites for NIK cleavage. (B) *Top* - Schematic of API2-MALT1-dependent NIK cleavage. *Bottom* - The S324-R325 residues are conserved among species, suggesting that an evolutionarily relevant role for NIK cleavage at this site may exist. (C) The C-terminal NIK cleavage fragment induces concentration-dependent p100 processing. HEK293T cells were transfected with increasing concentrations of HA-NIK(326-947) expression plasmid and the resulting p100 processing was assessed by Western Blot. (D) The C-terminal NIK cleavage fragment induces the expression of CXCR4, a noncanonical NF- $\kappa$ B gene target (18). CXCR4 is a chemokine receptor that is implicated in B-lymphomagenesis (23, 24). We also found that CXCR4 is significantly upregulated in t(11;18)-positive MALT lymphomas (see Fig. 4F and G).

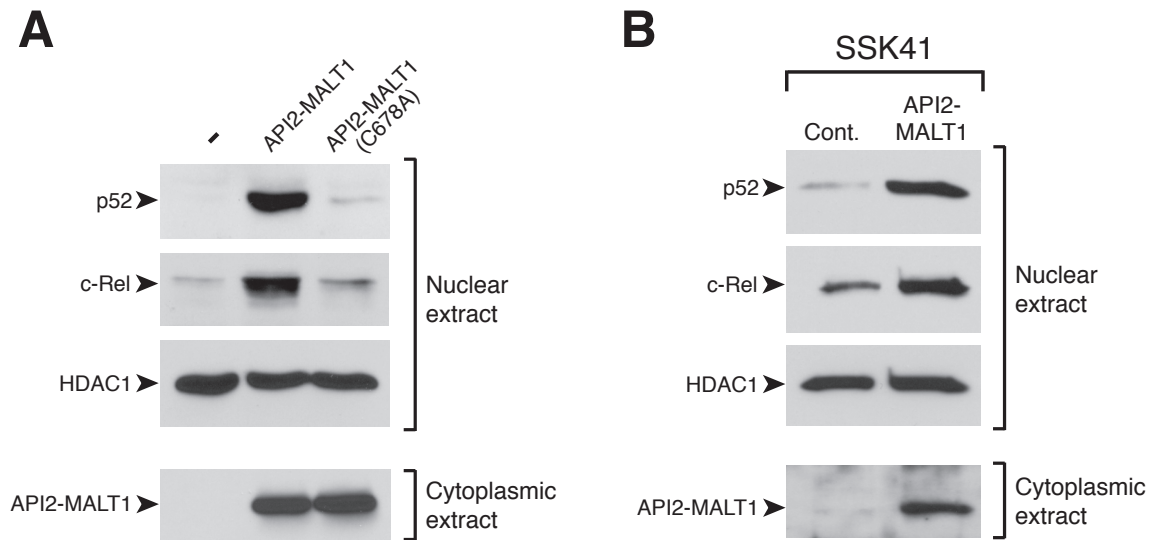

**Fig. S8. API2-MALT1 also induces c-Rel nuclear translocation.** Because previous work has shown that wild-type MALT1 signals to c-Rel upon BCR ligation (25), we also evaluated the effect of API2-MALT1 on c-Rel. **(A)** API2-MALT1 induces the nuclear translocation of c-Rel, and this requires an intact MALT1 protease domain. HEK293T cells were transfected as indicated, nuclear extracts were prepared, and the resulting nuclear translocation of p52 and c-Rel was assessed by Western blot. **(B)** API2-MALT1 expression in SSK41 cells is associated with enhanced nuclear translocation of p52 and c-Rel. Nuclear extracts were prepared for control and API2-MALT1 expressing SSK41 cells as indicated, and the levels of p52 and c-Rel were assessed by Western Blot.

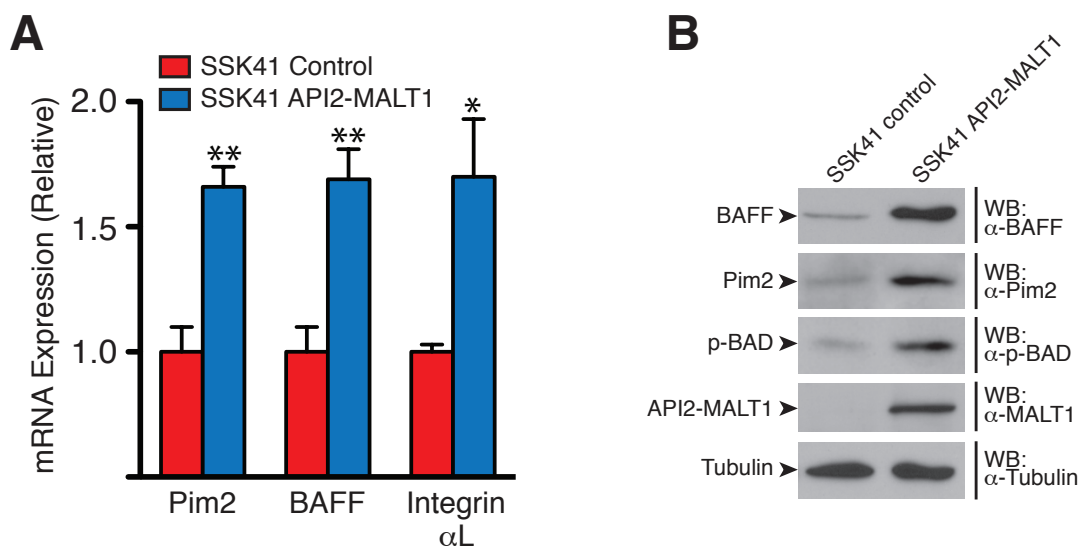

**Fig. S9. *API2-MALT1* promotes noncanonical *NF- $\kappa$ B* target gene expression in SSK41 B-cells.** (A) Levels of mRNA transcript were analyzed by quantitative RT-PCR. Data are expressed as an average  $\pm$  SEM for at least three determinations. \* =  $p < 0.05$ , \*\* =  $p < 0.005$ . (B) *API2-MALT1* expression results in enhanced levels of BAFF, Pim-2 and phospho-Ser<sup>112</sup>-BAD. SSK41 cell lysates were prepared, and protein levels were compared by Western blotting.

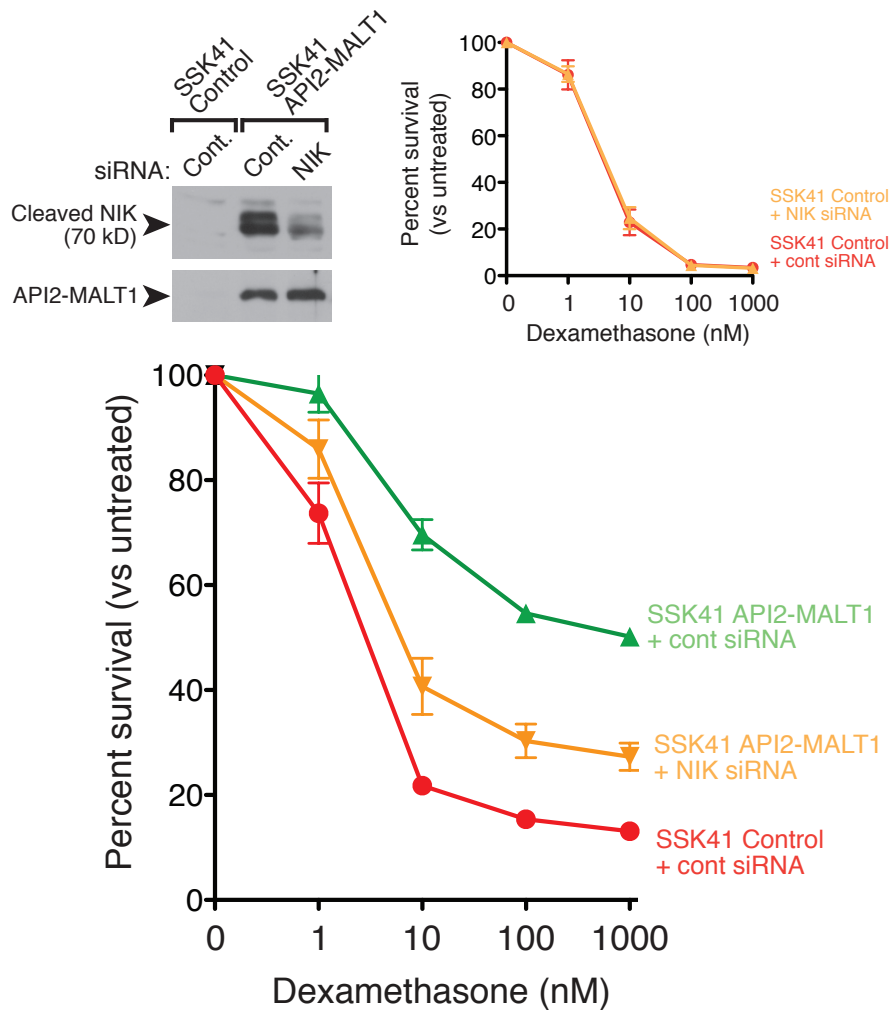

**Fig. S10. siRNA-mediated NIK knock-down abrogates API2-MALT1-dependent protection from dexamethasone-induced cell death.** Control or API2-MALT1 expressing SSK41 cells were transiently transfected with control or NIK siRNA and then treated with increasing concentrations of dexamethasone. The resulting cell viability was analyzed at 48 hours of dexamethasone treatment. Results are expressed as average  $\pm$  SEM of three determinations. **Inserts (top left):** Western blotting demonstrates effective knock-down of the 70kD NIK cleavage fragment, (top right): NIK siRNA had no effect on the control SSK41 cells. Data are representative of at least three separate experiments.

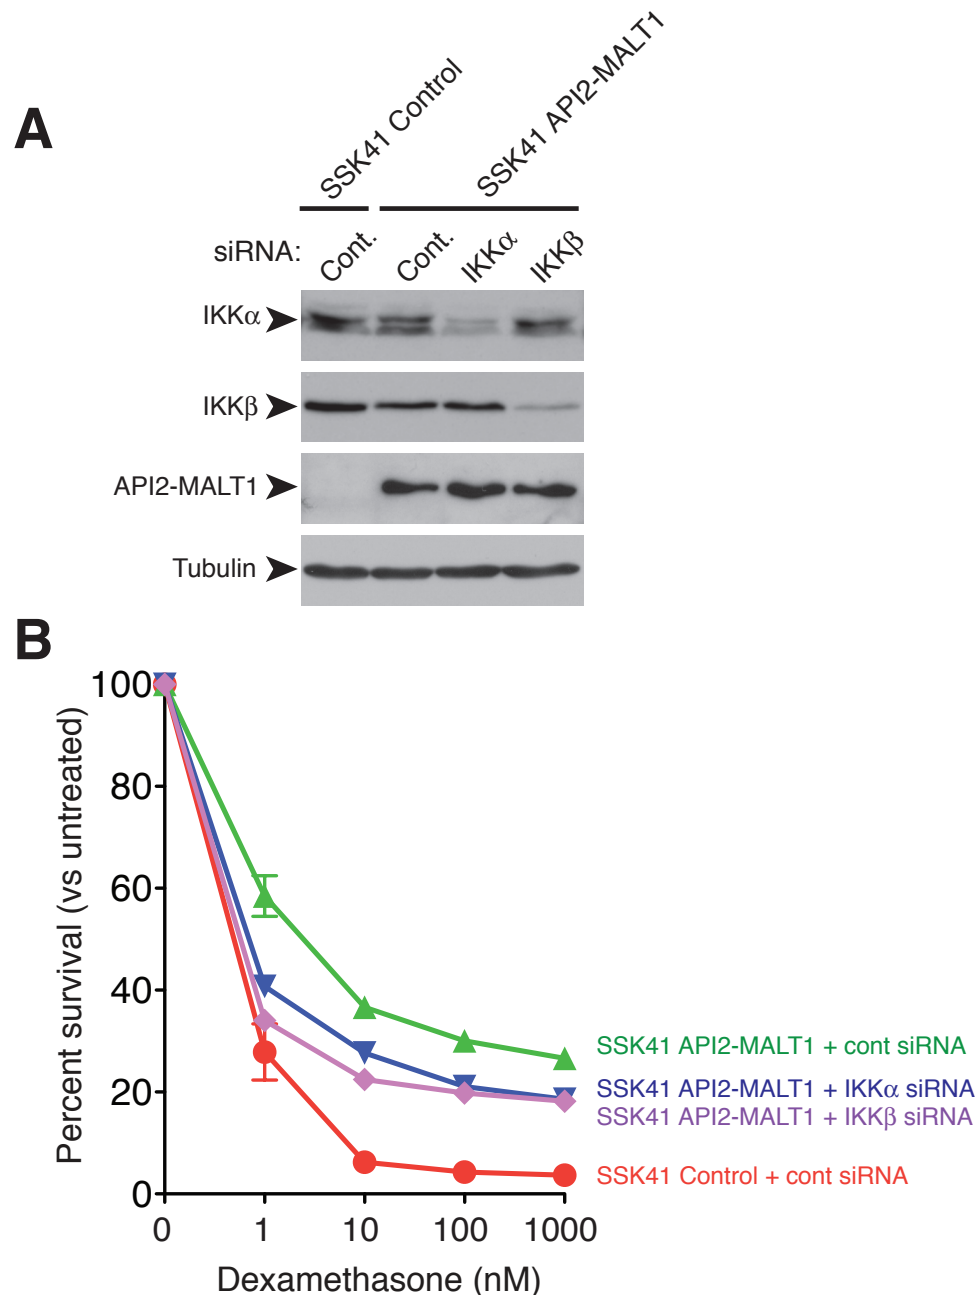

**Fig. S11. API2-MALT1-dependent protection from dexamethasone-induced cell death is mediated by a combination of canonical and noncanonical NF- $\kappa$ B signaling.** (A) Control or API2-MALT1 expressing SSK41 cells were transiently transfected with control, IKK $\alpha$ , or IKK $\beta$  siRNA. Western blotting demonstrates effective and specific knock-down of the IKK subunits and confirms effective expression of API2-MALT1 in cells harboring the transgene. (B) Cells were then treated with increasing concentrations of dexamethasone. The resulting cell viability was analyzed after 48 hours of dexamethasone treatment. Results are expressed as average  $\pm$  SEM of three determinations, and are representative of three separate experiments.

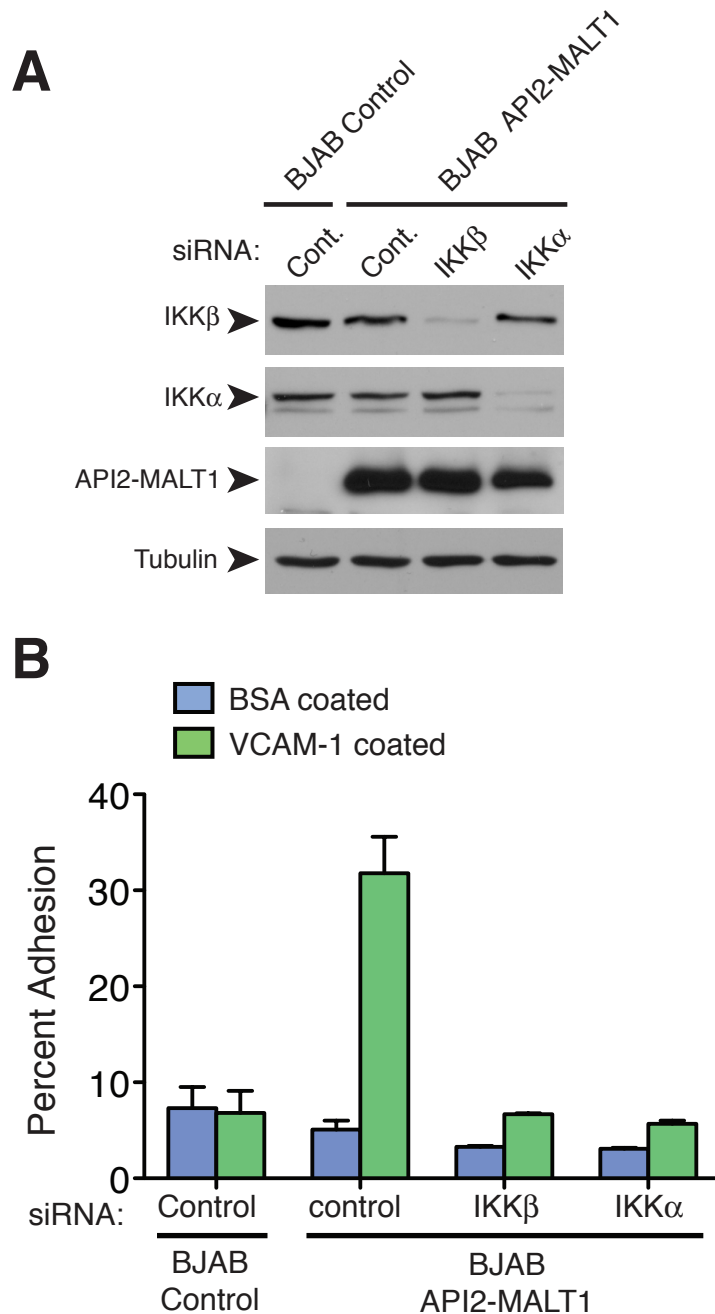

**Fig. S12. Both canonical and noncanonical NF- $\kappa$ B signaling contribute to API2-MALT1-dependent adhesion.** Control or API2-MALT1 expressing BJAB cells were transiently transfected with control, IKK $\beta$ , or IKK $\alpha$  siRNA. After 48 hours, cells were treated for 24 hours with doxycycline to induce API2-MALT1 expression in cells harboring the transgene, and were then plated onto either BSA- or VCAM-1 coated plates. **(A)** Western blotting demonstrates effective and specific knock-down of the IKK subunits as well as effective induction of API2-MALT1. **(B)** Following washing, the percentage of adherent cells was tallied.



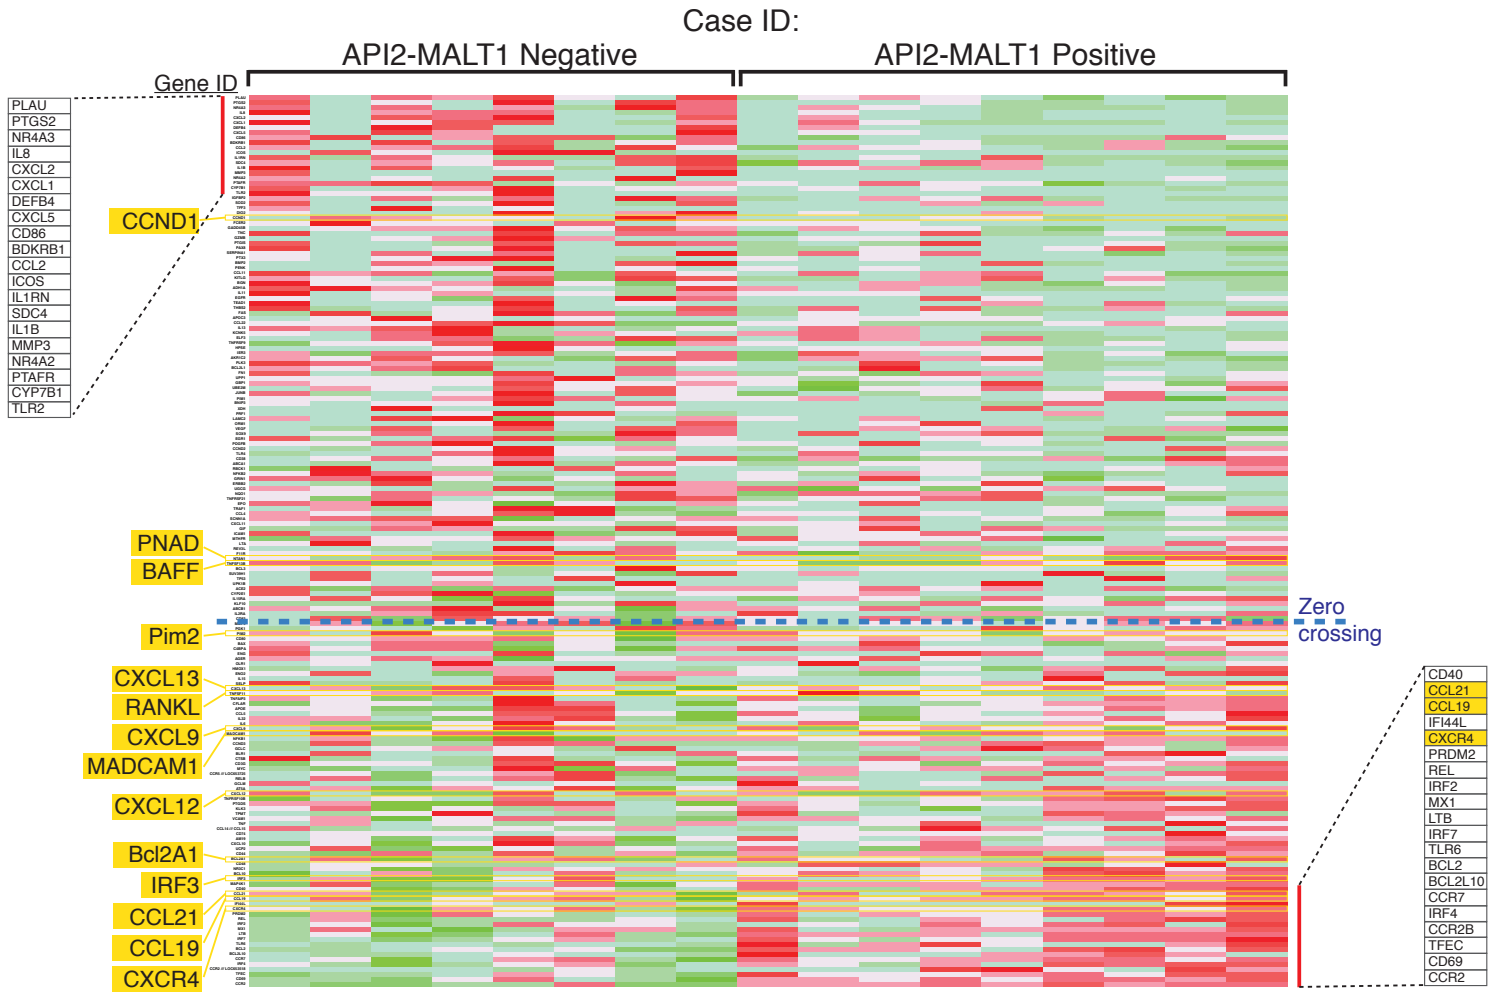

**Fig. S13. Heat map illustration of gene expression in *t*(11;18)-positive vs. translocation negative MALT lymphomas from Collection #1 (See methods).** Genes identified as noncanonical NF- $\kappa$ B target genes are highlighted in yellow and labeled on the left. The top 20 leading edge core genes are shown.

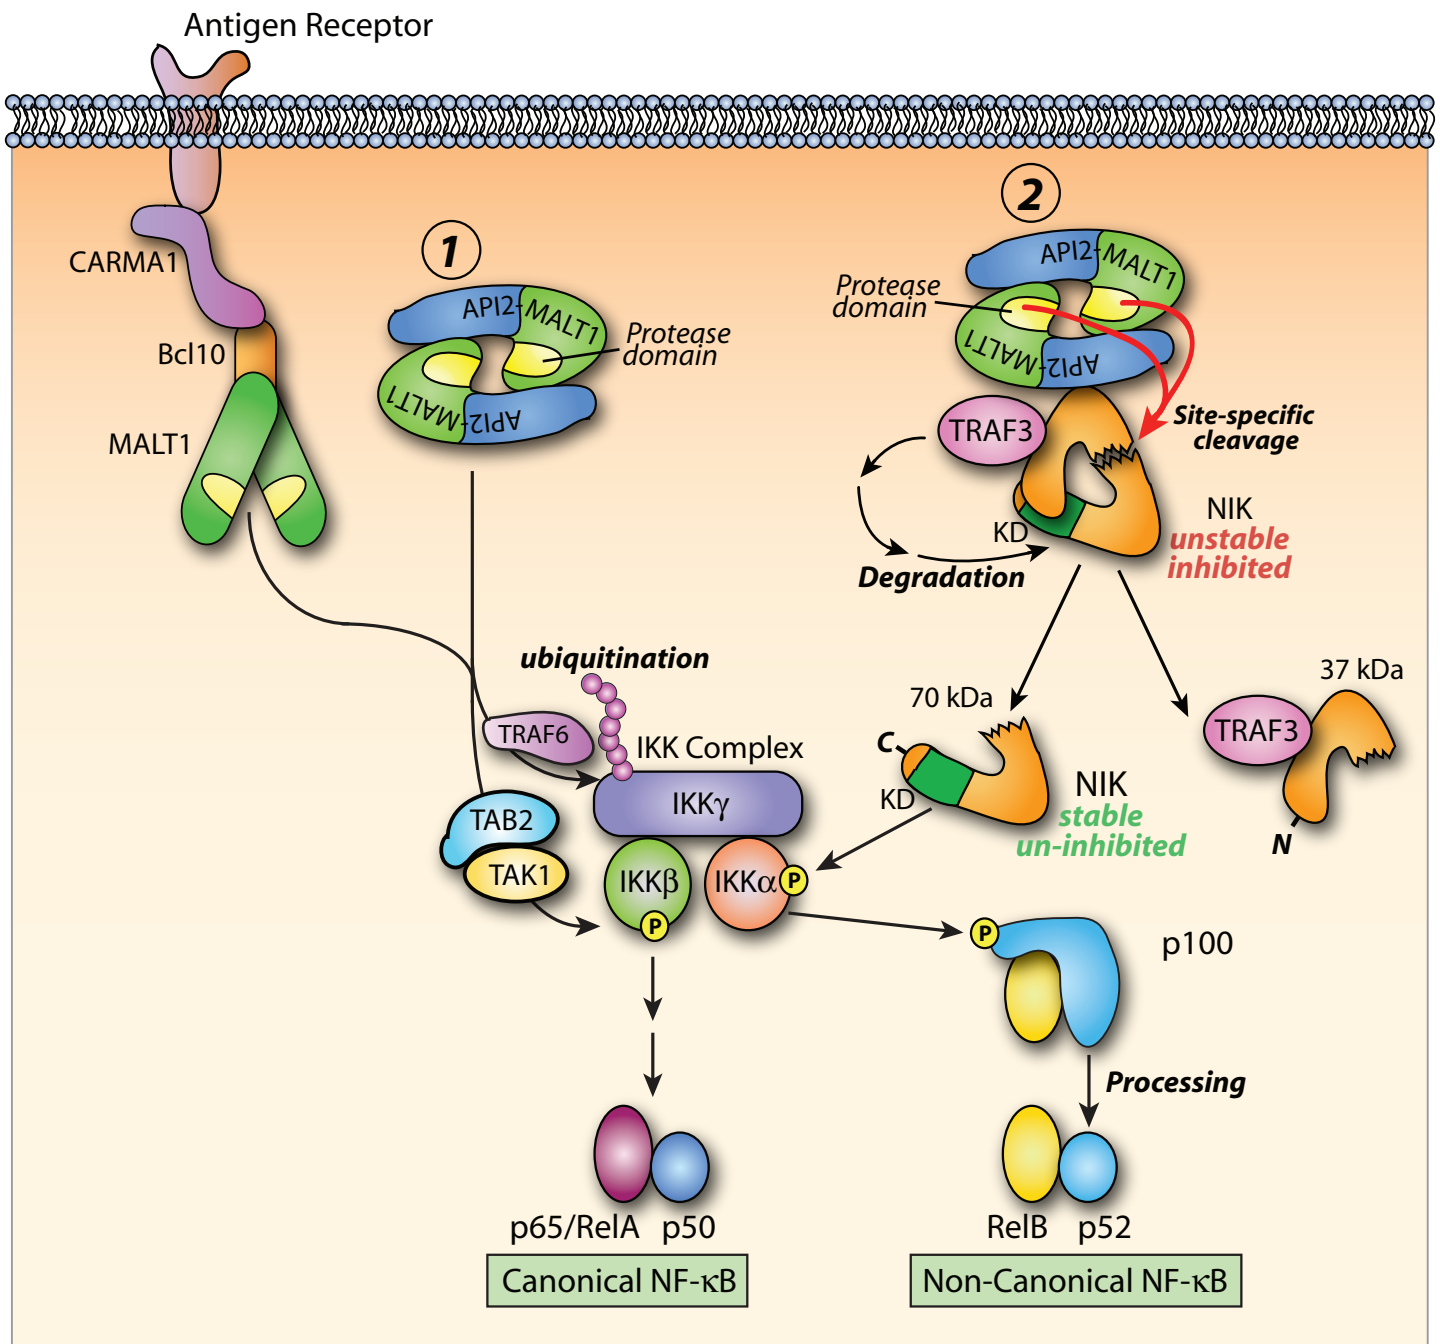

**Fig. S14. Schematic illustrating our model for the role of NIK cleavage in API2-MALT1-dependent lymphomagenesis.** We propose a model in which: (1) The API2 moiety mediates auto-oligomerization of API2-MALT1 and recruitment of NIK, (2) NIK is then placed in close proximity to the activated MALT1 protease domain and is made available as a substrate, (3) API2-MALT1-dependent NIK cleavage separates the TRAF3 binding site from the active kinase domain, and (4) The stabilized NIK kinase promotes deregulated noncanonical NF- $\kappa$ B signaling contributing to B-lymphomagenesis. The concept that the N-terminus of NIK contains an autoinhibitory domain that impairs NIK kinase activity (26), in addition to the TRAF3 binding site (27), is incorporated into the model.

Table S1.

| Gene symbol | Gene full name                                                                                        | Source                                                                                       |
|-------------|-------------------------------------------------------------------------------------------------------|----------------------------------------------------------------------------------------------|
| PIM2        | Pim-2 oncogene                                                                                        | Immunology, 2006; 25: 403-415. Blood, 2008; 111(2): 750-760.                                 |
| CCL21       | chemokine (C-C motif) ligand 21 (Secondary lymphoid tissue chemokine, SLC)                            | Immunology, 2002; 17: 525-535. EMBO, 2004; 23: 4202-4210. J. Immunol., 2004; 173: 6161-6168. |
| CCL19       | chemokine (C-C motif) ligand 19 (Epstein Barr virus-induced molecule 1 ligand CC chemokine, ELC)      | Immunology, 2002; 17: 525-535. EMBO, 2004; 23: 4202-4210. J. Immunol., 2004; 173: 6161-6168. |
| CXCL13      | chemokine (C-X-C motif) ligand 13 (B-lymphocyte chemoattractant, BLC)                                 | Immunology, 2002; 17: 525-535. EMBO, 2004; 23: 4202-4210. J. Immunol., 2004; 173: 6161-6168. |
| TNFSF13B    | B-cell activating factor belonging to the TNF family (BAFF)                                           | Immunology, 2002; 17: 525-535. EMBO, 2004; 23: 4202-4210.                                    |
| CXCL12      | chemokine (C-X-C motif) ligand 12 (stromal derived factor-1alpha, SDF-1)                              | Immunology, 2002; 17: 525-535. EMBO, 2004; 23: 4202-4210.                                    |
| BCL2A1      | BCL2-related protein A1                                                                               | Immunology, 2006; 25: 403-415.                                                               |
| CXCR4       | chemokine (C-S-C motif) receptor 4                                                                    | PNAS, 2004; 101: 141-146.                                                                    |
| TNFSF11     | tumor necrosis factor (ligand) superfamily, member 11 (RANK-L)                                        | Science, 2001; 293: 1495-1499.                                                               |
| CND1        | Cyclin D1                                                                                             | Endocrinology, 2007; 148(1): 268-278.                                                        |
| CXCL9       | chemokine (C-X-C) ligand 9                                                                            | PNAS, 2004; 101: 141-146.                                                                    |
| NTAN1       | N-terminal asparagine amidase (PNAD)                                                                  | J. Immunol., 2004; 173: 6161-6168.                                                           |
| MADCAM1     | mucosal vascular addressin cell adhesion molecule 1                                                   | Blood, 2007; 110: 2381-2389.                                                                 |
| IRF3        | interferon regulatory factor 3                                                                        | EMBO, 2004; 23: 4202-4210.                                                                   |
| TRIP10      | thyroid hormone receptor interactor 10                                                                | bioinformatics                                                                               |
| IL32        | interleukin 32                                                                                        | bioinformatics                                                                               |
| RCP9        | calcitonin gene-related peptide-receptor component protein                                            | bioinformatics                                                                               |
| ANKRD1      | ankyrin repeat domain 1 (cardiac muscle)                                                              | bioinformatics                                                                               |
| TNFRSF10B   | tumor necrosis factor receptor superfamily, member 10b                                                | bioinformatics                                                                               |
| AKR1C2      | aldo-keto reductase family 1, member C2 (dihydrodiol dehydrogenase 2)                                 | bioinformatics                                                                               |
| LDBIB       | lactate dehydrogenase B                                                                               | bioinformatics                                                                               |
| TEAD1       | TEA domain family member 1 (SV40 transcriptional enhancer factor)                                     | bioinformatics                                                                               |
| PRDM2       | PR domain containing 2, with ZNF domain                                                               | bioinformatics                                                                               |
| BACE2       | beta-site APP-cleaving enzyme 2                                                                       | bioinformatics                                                                               |
| SUV39H1     | suppressor of variegation 3-9 homolog 1 (Drosophila)                                                  | bioinformatics                                                                               |
| IL1F9       | interleukin 1 family, member 9                                                                        | bioinformatics                                                                               |
| ALOX12B     | arachidonate 12-lipoxygenase, 12R type                                                                | bioinformatics                                                                               |
| CARD15      | caspase recruitment domain family, member 15                                                          | bioinformatics                                                                               |
| CTF4        | CD74 antigen (invariant polypeptide of major histocompatibility complex, class II antigen-associated) | bioinformatics                                                                               |
| CXCL2       | chemokine (C-X-C motif) ligand 2                                                                      | bioinformatics                                                                               |
| DEFB4       | defensin, beta 4                                                                                      | bioinformatics                                                                               |
| IL15RA      | interleukin 15 receptor, alpha                                                                        | bioinformatics                                                                               |
| TPMT        | thiopurine S-methyltransferase                                                                        | bioinformatics                                                                               |
| TLR6        | toll-like receptor 6                                                                                  | bioinformatics                                                                               |
| TLR4        | toll-like receptor 4                                                                                  | bioinformatics                                                                               |
| SH3BGRL3    | SH3 domain binding glutamic acid-rich protein like 3                                                  | bioinformatics                                                                               |
| PLA2G2E     | phospholipase A2, group IIE                                                                           | bioinformatics                                                                               |
| ADAMTS12    | ADAM metalloproteinase with thrombospondin type 1 motif 12                                            | bioinformatics                                                                               |
| CSF2RA      | colony stimulating factor 2 receptor, alpha, low-affinity (granulocyte-macrophage)                    | bioinformatics                                                                               |
| MMP8        | matrix metalloproteinase 8 (neutrophil collagenase)                                                   | bioinformatics                                                                               |
| CCL7        | chemokine (C-C motif) ligand 7                                                                        | bioinformatics                                                                               |
| TNFRSF21    | tumor necrosis factor receptor superfamily, member 21                                                 | bioinformatics                                                                               |
| PLA2G4A     | phospholipase A2, group IVA (cytosolic, calcium-dependent)                                            | bioinformatics                                                                               |
| LAMC2       | laminin, gamma 2                                                                                      | bioinformatics                                                                               |
| BCL2L10     | BCL2-like 10 (apoptosis facilitator)                                                                  | bioinformatics                                                                               |
| TNFSF6      | tumor necrosis factor superfamily, member 6                                                           | bioinformatics                                                                               |
| CD105       | homodimeric transmembrane protein which is a major glycoprotein of the vascular endothelium           | bioinformatics                                                                               |
| TNFRSF6     | tumor necrosis factor receptor superfamily, member 6, decoy                                           | bioinformatics                                                                               |
| TNFSF5      | tumor necrosis factor superfamily, member 5                                                           | bioinformatics                                                                               |
| BM2         | influenza B virus BM2                                                                                 | bioinformatics                                                                               |
| HC3         | proteasome subunit HC3                                                                                | bioinformatics                                                                               |
| SIAT8A      | ST8 alpha-N-acetylneuraminidase alpha-2,8-sialyltransferase 1                                         | bioinformatics                                                                               |
| TBR         | tuberin                                                                                               | bioinformatics                                                                               |
| TNFRSF5     | tumor necrosis factor receptor superfamily, member 5, decoy                                           | bioinformatics                                                                               |
| RBCK1       | RanBP-type and C3HC4-type zinc finger containing 1                                                    | bioinformatics                                                                               |
| CCR2A       | chemokine (C-C motif) receptor 2 isoform A                                                            | bioinformatics                                                                               |
| CCR2B       | chemokine (C-C motif) receptor 2 isoform B                                                            | bioinformatics                                                                               |
| BIRC2       | baculoviral IAP repeat-containing 2                                                                   | Blood, 2005; 106(4): 1392 - 1399                                                             |
| ICAM1       | intercellular adhesion molecule 1 (CD54), human rhinovirus receptor                                   | Blood, 2005; 106(4): 1392 - 1399                                                             |
| CX3CL1      | chemokine (C-X3-C motif) ligand 1                                                                     | Blood, 2005; 106(4): 1392 - 1399                                                             |
| NR4A3       | nuclear receptor subfamily 4, group A, member 3                                                       | Journal of Biological Chemistry, 2005; 280(32): 29256-29262                                  |
| BCL10       | B-cell CLL/lymphoma 10                                                                                | Journal of Biological Chemistry, 2006; 281(1): 167 - 175                                     |
| LAMP2       | low molecular weight protein 2                                                                        | http://people.bu.edu/gilmore/nf-kb/target/index.html                                         |
| CTSL1       | cathepsin L1                                                                                          | http://people.bu.edu/gilmore/nf-kb/target/index.html                                         |
| KLK3        | kallikrein-related peptidase 3                                                                        | http://people.bu.edu/gilmore/nf-kb/target/index.html                                         |
| BMP2        | bone morphogenetic protein 2                                                                          | http://people.bu.edu/gilmore/nf-kb/target/index.html                                         |
| AMH         | anti-Mullerian hormone                                                                                | http://people.bu.edu/gilmore/nf-kb/target/index.html                                         |
| NOD2        | nucleotide-binding oligomerization domain containing 2                                                | http://people.bu.edu/gilmore/nf-kb/target/index.html                                         |
| CYP2C11     | Cytochrome P450 2C11                                                                                  | http://people.bu.edu/gilmore/nf-kb/target/index.html                                         |
| NK4         | N-terminal hairpin and subsequent four-kringle domains of hepatocyte growth factor                    | http://people.bu.edu/gilmore/nf-kb/target/index.html                                         |
| CCL15       | chemokine (C-C motif) ligand 15                                                                       | http://people.bu.edu/gilmore/nf-kb/target/index.html                                         |
| MYC         | v-myc myelocytomatosis viral oncogene homolog (avian)                                                 | http://people.bu.edu/gilmore/nf-kb/target/index.html                                         |
| IL1B        | interleukin 1, beta                                                                                   | http://people.bu.edu/gilmore/nf-kb/target/index.html                                         |
| TERT        | telomerase reverse transcriptase                                                                      | http://people.bu.edu/gilmore/nf-kb/target/index.html                                         |
| SELP        | selectin P (granule membrane protein 140kDa, antigen CD62)                                            | http://people.bu.edu/gilmore/nf-kb/target/index.html                                         |
| TNFAIP3     | tumor necrosis factor, alpha-induced protein 3                                                        | http://people.bu.edu/gilmore/nf-kb/target/index.html                                         |
| CD44        | CD44 antigen (homing function and Indian blood group system)                                          | http://people.bu.edu/gilmore/nf-kb/target/index.html                                         |
| NOS2A       | nitric oxide synthase 2A (inducible, hepatocytes)                                                     | http://people.bu.edu/gilmore/nf-kb/target/index.html                                         |
| SOD2        | superoxide dismutase 2, mitochondrial                                                                 | http://people.bu.edu/gilmore/nf-kb/target/index.html                                         |
| CSF3        | colony stimulating factor 3 (granulocyte)                                                             | http://people.bu.edu/gilmore/nf-kb/target/index.html                                         |
| BCL3        | B-cell CLL/lymphoma 3                                                                                 | http://people.bu.edu/gilmore/nf-kb/target/index.html                                         |
| RAGE        | renal tumor antigen                                                                                   | http://people.bu.edu/gilmore/nf-kb/target/index.html                                         |
| GRIN1       | glutamate receptor, ionotropic, N-methyl D-aspartate 1                                                | http://people.bu.edu/gilmore/nf-kb/target/index.html                                         |
| IGHG4       | immunoglobulin heavy constant gamma 4 (G4m marker)                                                    | http://people.bu.edu/gilmore/nf-kb/target/index.html                                         |
| IGHG3       | immunoglobulin heavy constant gamma 3 (G3m marker)                                                    | http://people.bu.edu/gilmore/nf-kb/target/index.html                                         |
| SERPINA1    | serpin peptidase inhibitor, clade A (alpha-1 antitrypsin, antitrypsin), member 1                      | http://people.bu.edu/gilmore/nf-kb/target/index.html                                         |
| NR4A2       | nuclear receptor subfamily 4, group A, member 2                                                       | http://people.bu.edu/gilmore/nf-kb/target/index.html                                         |
| NFKB1       | nuclear factor of kappa light polypeptide gene enhancer in B-cells 1 (p105)                           | http://people.bu.edu/gilmore/nf-kb/target/index.html                                         |
| NFKBIA      | nuclear factor of kappa light polypeptide gene enhancer in B-cells inhibitor, alpha                   | http://people.bu.edu/gilmore/nf-kb/target/index.html                                         |
| BCL2A1      | BCL2-related protein A1                                                                               | http://people.bu.edu/gilmore/nf-kb/target/index.html                                         |
| ADH1A       | alcohol dehydrogenase 1A (class I), alpha polypeptide                                                 | http://people.bu.edu/gilmore/nf-kb/target/index.html                                         |
| AGER        | advanced glycosylation end product-specific receptor                                                  | http://people.bu.edu/gilmore/nf-kb/target/index.html                                         |
| AMH         | anti-Mullerian hormone                                                                                | http://people.bu.edu/gilmore/nf-kb/target/index.html                                         |
| ARFRP1      | ADP-ribosylation factor related protein 1                                                             | http://people.bu.edu/gilmore/nf-kb/target/index.html                                         |
| BCL2L1      | BCL2-like 1                                                                                           | http://people.bu.edu/gilmore/nf-kb/target/index.html                                         |
| BDKRB1      | bradykinin receptor B1                                                                                | http://people.bu.edu/gilmore/nf-kb/target/index.html                                         |
| BLR1        | Barkitt lymphoma receptor 1, GTP binding protein (chemokine (C-X-C motif) receptor 5)                 | http://people.bu.edu/gilmore/nf-kb/target/index.html                                         |
| BMP2        | bone morphogenetic protein 2                                                                          | http://people.bu.edu/gilmore/nf-kb/target/index.html                                         |
| CASP4       | caspase 4, apoptosis-related cysteine peptidase                                                       | http://people.bu.edu/gilmore/nf-kb/target/index.html                                         |
| CD209       | CD209 antigen                                                                                         | http://people.bu.edu/gilmore/nf-kb/target/index.html                                         |
| CRP         | C-reactive protein, pentraxin-related                                                                 | http://people.bu.edu/gilmore/nf-kb/target/index.html                                         |
| CXCL9       | chemokine (C-X-C motif) ligand 9                                                                      | http://people.bu.edu/gilmore/nf-kb/target/index.html                                         |
| FTH1        | ferritin, heavy polypeptide 1                                                                         | http://people.bu.edu/gilmore/nf-kb/target/index.html                                         |
| GSTP1       | glutathione S-transferase pi                                                                          | http://people.bu.edu/gilmore/nf-kb/target/index.html                                         |
| HMOX1       | heme oxygenase (decyclinase) 1                                                                        | http://people.bu.edu/gilmore/nf-kb/target/index.html                                         |
| IER3        | immediate early response 3                                                                            | http://people.bu.edu/gilmore/nf-kb/target/index.html                                         |
| IFNB1       | interferon, beta 1, fibroblast                                                                        | http://people.bu.edu/gilmore/nf-kb/target/index.html                                         |
| IL1RN       | interleukin 1 receptor antagonist                                                                     | http://people.bu.edu/gilmore/nf-kb/target/index.html                                         |
| KLK3        | kallikrein 3, (prostate specific antigen)                                                             | http://people.bu.edu/gilmore/nf-kb/target/index.html                                         |
| NPY1R       | neuropeptide Y receptor Y1                                                                            | http://people.bu.edu/gilmore/nf-kb/target/index.html                                         |
| NOO1        | NAD(P)H dehydrogenase, quinone 1                                                                      | http://people.bu.edu/gilmore/nf-kb/target/index.html                                         |
| OPRM1       | opioid receptor, mu 1                                                                                 | http://people.bu.edu/gilmore/nf-kb/target/index.html                                         |
| PLAU        | plasminogen activator, urokinase                                                                      | http://people.bu.edu/gilmore/nf-kb/target/index.html                                         |
| PLCD1       | phospholipase C, delta 1                                                                              | http://people.bu.edu/gilmore/nf-kb/target/index.html                                         |
| PTAFR       | platelet-activating factor receptor                                                                   | http://people.bu.edu/gilmore/nf-kb/target/index.html                                         |
| PTGDS       | prostaglandin D2 synthase 21kDa (brain)                                                               | http://people.bu.edu/gilmore/nf-kb/target/index.html                                         |
| PTGS2       | prostaglandin-endoperoxide synthase 2 (prostaglandin G/H synthase and cyclooxygenase)                 | http://people.bu.edu/gilmore/nf-kb/target/index.html                                         |
| SCNN1A      | sodium channel, nonvoltage-gated 1 alpha                                                              | http://people.bu.edu/gilmore/nf-kb/target/index.html                                         |
| SELE        | selectin E (endothelial adhesion molecule 1)                                                          | http://people.bu.edu/gilmore/nf-kb/target/index.html                                         |
| TACR1       | tachykinin receptor 1                                                                                 | http://people.bu.edu/gilmore/nf-kb/target/index.html                                         |
| TAP1        | transporter 1, ATP-binding cassette, sub-family B (MDR/TAP)                                           | http://people.bu.edu/gilmore/nf-kb/target/index.html                                         |
| TFPI2       | Tissue factor pathway inhibitor 2                                                                     | http://people.bu.edu/gilmore/nf-kb/target/index.html                                         |
| TNC         | tenascin C (hexabrachion)                                                                             | http://people.bu.edu/gilmore/nf-kb/target/index.html                                         |
| TNF         | tumor necrosis factor (TNF superfamily, member 2)                                                     | http://people.bu.edu/gilmore/nf-kb/target/index.html                                         |

|          |                                                                                                                                                       |                                                                                                                         |
|----------|-------------------------------------------------------------------------------------------------------------------------------------------------------|-------------------------------------------------------------------------------------------------------------------------|
| TNFRSF9  | tumor necrosis factor receptor superfamily, member 9                                                                                                  | <a href="http://people.bu.edu/gilmore/nf-kb/target/index.html">http://people.bu.edu/gilmore/nf-kb/target/index.html</a> |
| VEGF     | vascular endothelial growth factor                                                                                                                    | <a href="http://people.bu.edu/gilmore/nf-kb/target/index.html">http://people.bu.edu/gilmore/nf-kb/target/index.html</a> |
| CCL5     | chemokine (C-C motif) ligand 5                                                                                                                        | <a href="http://people.bu.edu/gilmore/nf-kb/target/index.html">http://people.bu.edu/gilmore/nf-kb/target/index.html</a> |
| CYP2E1   | cytochrome P450, family 2, subfamily E, polypeptide 1                                                                                                 | <a href="http://people.bu.edu/gilmore/nf-kb/target/index.html">http://people.bu.edu/gilmore/nf-kb/target/index.html</a> |
| PGK1     | phosphoglycerate kinase 1                                                                                                                             | <a href="http://people.bu.edu/gilmore/nf-kb/target/index.html">http://people.bu.edu/gilmore/nf-kb/target/index.html</a> |
| CTSB     | cathepsin B                                                                                                                                           | <a href="http://people.bu.edu/gilmore/nf-kb/target/index.html">http://people.bu.edu/gilmore/nf-kb/target/index.html</a> |
| HMGNI1   | high-mobility group nucleosome binding domain 1                                                                                                       | <a href="http://people.bu.edu/gilmore/nf-kb/target/index.html">http://people.bu.edu/gilmore/nf-kb/target/index.html</a> |
| CND2     | cyclin D2                                                                                                                                             | <a href="http://people.bu.edu/gilmore/nf-kb/target/index.html">http://people.bu.edu/gilmore/nf-kb/target/index.html</a> |
| BGN      | biglycan                                                                                                                                              | <a href="http://people.bu.edu/gilmore/nf-kb/target/index.html">http://people.bu.edu/gilmore/nf-kb/target/index.html</a> |
| ENO2     | enolase 2 (gamma, neuronal)                                                                                                                           | <a href="http://people.bu.edu/gilmore/nf-kb/target/index.html">http://people.bu.edu/gilmore/nf-kb/target/index.html</a> |
| VIM      | vimentin                                                                                                                                              | <a href="http://people.bu.edu/gilmore/nf-kb/target/index.html">http://people.bu.edu/gilmore/nf-kb/target/index.html</a> |
| JUNB     | jun B proto-oncogene                                                                                                                                  | <a href="http://people.bu.edu/gilmore/nf-kb/target/index.html">http://people.bu.edu/gilmore/nf-kb/target/index.html</a> |
| ELF3     | E74-like factor 3 (ets domain transcription factor, epithelial-specific)                                                                              | <a href="http://people.bu.edu/gilmore/nf-kb/target/index.html">http://people.bu.edu/gilmore/nf-kb/target/index.html</a> |
| EGR1     | early growth response 1                                                                                                                               | <a href="http://people.bu.edu/gilmore/nf-kb/target/index.html">http://people.bu.edu/gilmore/nf-kb/target/index.html</a> |
| CND3     | cyclin D3                                                                                                                                             | <a href="http://people.bu.edu/gilmore/nf-kb/target/index.html">http://people.bu.edu/gilmore/nf-kb/target/index.html</a> |
| TP53     | tumor protein p53 (Li-Fraumeni syndrome)                                                                                                              | <a href="http://people.bu.edu/gilmore/nf-kb/target/index.html">http://people.bu.edu/gilmore/nf-kb/target/index.html</a> |
| ENG      | endoglin (Osler-Rendu-Weber syndrome 1)                                                                                                               | <a href="http://people.bu.edu/gilmore/nf-kb/target/index.html">http://people.bu.edu/gilmore/nf-kb/target/index.html</a> |
| BNIP3    | BC1.2/adenovirus E1B 19kDa interacting protein 3                                                                                                      | <a href="http://people.bu.edu/gilmore/nf-kb/target/index.html">http://people.bu.edu/gilmore/nf-kb/target/index.html</a> |
| EGFR     | epidermal growth factor receptor (erythroblastic leukemia viral (v-erb-b) oncogene homolog, avian)                                                    | <a href="http://people.bu.edu/gilmore/nf-kb/target/index.html">http://people.bu.edu/gilmore/nf-kb/target/index.html</a> |
| SDC4     | syndecan 4 (amphiglycan, ryudocan)                                                                                                                    | <a href="http://people.bu.edu/gilmore/nf-kb/target/index.html">http://people.bu.edu/gilmore/nf-kb/target/index.html</a> |
| IRF2     | interferon inducible protein 2                                                                                                                        | <a href="http://people.bu.edu/gilmore/nf-kb/target/index.html">http://people.bu.edu/gilmore/nf-kb/target/index.html</a> |
| MX1      | myxovirus (influenza virus) resistance 1, interferon-inducible protein p78 (mouse)                                                                    | <a href="http://people.bu.edu/gilmore/nf-kb/target/index.html">http://people.bu.edu/gilmore/nf-kb/target/index.html</a> |
| GBP1     | guanylate binding protein 1, interferon-inducible, 67kDa                                                                                              | <a href="http://people.bu.edu/gilmore/nf-kb/target/index.html">http://people.bu.edu/gilmore/nf-kb/target/index.html</a> |
| KLF10    | Kruppel-like factor 10                                                                                                                                | <a href="http://people.bu.edu/gilmore/nf-kb/target/index.html">http://people.bu.edu/gilmore/nf-kb/target/index.html</a> |
| IRF1     | interferon regulatory factor 1                                                                                                                        | <a href="http://people.bu.edu/gilmore/nf-kb/target/index.html">http://people.bu.edu/gilmore/nf-kb/target/index.html</a> |
| IGFBP2   | insulin-like growth factor binding protein 2, 36kDa                                                                                                   | <a href="http://people.bu.edu/gilmore/nf-kb/target/index.html">http://people.bu.edu/gilmore/nf-kb/target/index.html</a> |
| IL8      | interleukin 8                                                                                                                                         | <a href="http://people.bu.edu/gilmore/nf-kb/target/index.html">http://people.bu.edu/gilmore/nf-kb/target/index.html</a> |
| GCLC     | glutamate-cysteine ligase, catalytic subunit                                                                                                          | <a href="http://people.bu.edu/gilmore/nf-kb/target/index.html">http://people.bu.edu/gilmore/nf-kb/target/index.html</a> |
| SOX9     | SOX (sex determining region Y)-box 9 (campomelic dysplasia, autosomal sex-reversal)                                                                   | <a href="http://people.bu.edu/gilmore/nf-kb/target/index.html">http://people.bu.edu/gilmore/nf-kb/target/index.html</a> |
| STAT5A   | signal transducer and activator of transcription 5A                                                                                                   | <a href="http://people.bu.edu/gilmore/nf-kb/target/index.html">http://people.bu.edu/gilmore/nf-kb/target/index.html</a> |
| THBS2    | thrombospondin 2                                                                                                                                      | <a href="http://people.bu.edu/gilmore/nf-kb/target/index.html">http://people.bu.edu/gilmore/nf-kb/target/index.html</a> |
| UBE2M    | ubiquitin-conjugating enzyme E2M (UBC12 homolog, yeast)                                                                                               | <a href="http://people.bu.edu/gilmore/nf-kb/target/index.html">http://people.bu.edu/gilmore/nf-kb/target/index.html</a> |
| UPP1     | uridine phosphorylase 1                                                                                                                               | <a href="http://people.bu.edu/gilmore/nf-kb/target/index.html">http://people.bu.edu/gilmore/nf-kb/target/index.html</a> |
| IRF2     | interferon regulatory factor 2                                                                                                                        | <a href="http://people.bu.edu/gilmore/nf-kb/target/index.html">http://people.bu.edu/gilmore/nf-kb/target/index.html</a> |
| APOE     | apolipoprotein E                                                                                                                                      | <a href="http://people.bu.edu/gilmore/nf-kb/target/index.html">http://people.bu.edu/gilmore/nf-kb/target/index.html</a> |
| ABCA1    | ATP-binding cassette, sub-family A (ABCI), member 1                                                                                                   | <a href="http://people.bu.edu/gilmore/nf-kb/target/index.html">http://people.bu.edu/gilmore/nf-kb/target/index.html</a> |
| BCL2     | B-cell CLL lymphoma 2                                                                                                                                 | <a href="http://people.bu.edu/gilmore/nf-kb/target/index.html">http://people.bu.edu/gilmore/nf-kb/target/index.html</a> |
| DIO2     | deiodinase, iodothyronine, type II                                                                                                                    | <a href="http://people.bu.edu/gilmore/nf-kb/target/index.html">http://people.bu.edu/gilmore/nf-kb/target/index.html</a> |
| VCAM1    | vascular cell adhesion molecule 1                                                                                                                     | <a href="http://people.bu.edu/gilmore/nf-kb/target/index.html">http://people.bu.edu/gilmore/nf-kb/target/index.html</a> |
| GCLM     | glutamate-cysteine ligase, modifier subunit                                                                                                           | <a href="http://people.bu.edu/gilmore/nf-kb/target/index.html">http://people.bu.edu/gilmore/nf-kb/target/index.html</a> |
| MMP9     | matrix metalloproteinase 9 (gelatinase B, 92kDa gelatinase, 92kDa type IV collagenase)                                                                | <a href="http://people.bu.edu/gilmore/nf-kb/target/index.html">http://people.bu.edu/gilmore/nf-kb/target/index.html</a> |
| CD48     | CD48 antigen (B-cell membrane protein)                                                                                                                | <a href="http://people.bu.edu/gilmore/nf-kb/target/index.html">http://people.bu.edu/gilmore/nf-kb/target/index.html</a> |
| PDGFB    | platelet-derived growth factor beta polypeptide (simian sarcoma viral (v-sis) oncogene homolog)                                                       | <a href="http://people.bu.edu/gilmore/nf-kb/target/index.html">http://people.bu.edu/gilmore/nf-kb/target/index.html</a> |
| TRAF2    | TNF receptor-associated factor 2                                                                                                                      | <a href="http://people.bu.edu/gilmore/nf-kb/target/index.html">http://people.bu.edu/gilmore/nf-kb/target/index.html</a> |
| IFI44L   | interferon-induced protein 44-like                                                                                                                    | <a href="http://people.bu.edu/gilmore/nf-kb/target/index.html">http://people.bu.edu/gilmore/nf-kb/target/index.html</a> |
| CD83     | CD83 antigen (activated B lymphocytes, immunoglobulin superfamily)                                                                                    | <a href="http://people.bu.edu/gilmore/nf-kb/target/index.html">http://people.bu.edu/gilmore/nf-kb/target/index.html</a> |
| CXCL1    | chemokine (C-X-C motif) ligand 1 (melanoma growth stimulating activity, alpha)                                                                        | <a href="http://people.bu.edu/gilmore/nf-kb/target/index.html">http://people.bu.edu/gilmore/nf-kb/target/index.html</a> |
| IRF4     | interferon regulatory factor 4                                                                                                                        | <a href="http://people.bu.edu/gilmore/nf-kb/target/index.html">http://people.bu.edu/gilmore/nf-kb/target/index.html</a> |
| TFE3     | trefoil factor 3 (intestinal)                                                                                                                         | <a href="http://people.bu.edu/gilmore/nf-kb/target/index.html">http://people.bu.edu/gilmore/nf-kb/target/index.html</a> |
| MUC2     | mucin 2, intestinal/tracheal                                                                                                                          | <a href="http://people.bu.edu/gilmore/nf-kb/target/index.html">http://people.bu.edu/gilmore/nf-kb/target/index.html</a> |
| AFP      | alpha-fetoprotein                                                                                                                                     | <a href="http://people.bu.edu/gilmore/nf-kb/target/index.html">http://people.bu.edu/gilmore/nf-kb/target/index.html</a> |
| FAS      | Fas (TNF receptor superfamily, member 6)                                                                                                              | <a href="http://people.bu.edu/gilmore/nf-kb/target/index.html">http://people.bu.edu/gilmore/nf-kb/target/index.html</a> |
| UGCG     | UDP-glucose ceramide glucosyltransferase                                                                                                              | <a href="http://people.bu.edu/gilmore/nf-kb/target/index.html">http://people.bu.edu/gilmore/nf-kb/target/index.html</a> |
| TLR2     | tolllike receptor 2                                                                                                                                   | <a href="http://people.bu.edu/gilmore/nf-kb/target/index.html">http://people.bu.edu/gilmore/nf-kb/target/index.html</a> |
| PK3      | polo-like kinase 3 (Drosophila)                                                                                                                       | <a href="http://people.bu.edu/gilmore/nf-kb/target/index.html">http://people.bu.edu/gilmore/nf-kb/target/index.html</a> |
| CD40     | CD40 antigen (TNF receptor superfamily member 5)                                                                                                      | <a href="http://people.bu.edu/gilmore/nf-kb/target/index.html">http://people.bu.edu/gilmore/nf-kb/target/index.html</a> |
| RELB     | v-rel reticulendotheliosis viral oncogene homolog B, nuclear factor of kappa light polypeptide gene enhancer in B-cells 3 (avian)                     | <a href="http://people.bu.edu/gilmore/nf-kb/target/index.html">http://people.bu.edu/gilmore/nf-kb/target/index.html</a> |
| IL6      | interleukin 6 (interferon, beta 2)                                                                                                                    | <a href="http://people.bu.edu/gilmore/nf-kb/target/index.html">http://people.bu.edu/gilmore/nf-kb/target/index.html</a> |
| GAD1     | glutamate decarboxylase 1 (brain, 67kDa)                                                                                                              | <a href="http://people.bu.edu/gilmore/nf-kb/target/index.html">http://people.bu.edu/gilmore/nf-kb/target/index.html</a> |
| IGFBP1   | insulin-like growth factor binding protein 1                                                                                                          | <a href="http://people.bu.edu/gilmore/nf-kb/target/index.html">http://people.bu.edu/gilmore/nf-kb/target/index.html</a> |
| PRL      | prolactin                                                                                                                                             | <a href="http://people.bu.edu/gilmore/nf-kb/target/index.html">http://people.bu.edu/gilmore/nf-kb/target/index.html</a> |
| TRAF1    | TNF receptor-associated factor 1                                                                                                                      | <a href="http://people.bu.edu/gilmore/nf-kb/target/index.html">http://people.bu.edu/gilmore/nf-kb/target/index.html</a> |
| CD86     | CD86 antigen (CD28 antigen ligand 2, B7-2 antigen)                                                                                                    | <a href="http://people.bu.edu/gilmore/nf-kb/target/index.html">http://people.bu.edu/gilmore/nf-kb/target/index.html</a> |
| CD38     | CD38 antigen (p45)                                                                                                                                    | <a href="http://people.bu.edu/gilmore/nf-kb/target/index.html">http://people.bu.edu/gilmore/nf-kb/target/index.html</a> |
| POMC     | proopiomelanocortin (adrenocorticotropin/ beta-lipotropin/ alpha-melanocyte stimulating hormone/ beta-melanocyte stimulating hormone/ beta-endorphin) | <a href="http://people.bu.edu/gilmore/nf-kb/target/index.html">http://people.bu.edu/gilmore/nf-kb/target/index.html</a> |
| APOC3    | apolipoprotein C-III                                                                                                                                  | <a href="http://people.bu.edu/gilmore/nf-kb/target/index.html">http://people.bu.edu/gilmore/nf-kb/target/index.html</a> |
| MMP3     | matrix metalloproteinase 3 (stromelysin 1, progelatinase)                                                                                             | <a href="http://people.bu.edu/gilmore/nf-kb/target/index.html">http://people.bu.edu/gilmore/nf-kb/target/index.html</a> |
| IL15     | interleukin 15                                                                                                                                        | <a href="http://people.bu.edu/gilmore/nf-kb/target/index.html">http://people.bu.edu/gilmore/nf-kb/target/index.html</a> |
| WT1      | Wilms tumor 1                                                                                                                                         | <a href="http://people.bu.edu/gilmore/nf-kb/target/index.html">http://people.bu.edu/gilmore/nf-kb/target/index.html</a> |
| PTX3     | pentraxin-related gene, rapidly induced by IL-1 beta                                                                                                  | <a href="http://people.bu.edu/gilmore/nf-kb/target/index.html">http://people.bu.edu/gilmore/nf-kb/target/index.html</a> |
| APOBEC2  | apolipoprotein B mRNA editing enzyme, catalytic polypeptide-like 2                                                                                    | <a href="http://people.bu.edu/gilmore/nf-kb/target/index.html">http://people.bu.edu/gilmore/nf-kb/target/index.html</a> |
| MAP4K1   | mitogen-activated protein kinase kinase kinase kinase 1                                                                                               | <a href="http://people.bu.edu/gilmore/nf-kb/target/index.html">http://people.bu.edu/gilmore/nf-kb/target/index.html</a> |
| CCR7     | chemokine (C-C motif) receptor 7                                                                                                                      | <a href="http://people.bu.edu/gilmore/nf-kb/target/index.html">http://people.bu.edu/gilmore/nf-kb/target/index.html</a> |
| IL2RA    | interleukin 2 receptor, alpha                                                                                                                         | <a href="http://people.bu.edu/gilmore/nf-kb/target/index.html">http://people.bu.edu/gilmore/nf-kb/target/index.html</a> |
| CDX1     | caudal type homeo box transcription factor 1                                                                                                          | <a href="http://people.bu.edu/gilmore/nf-kb/target/index.html">http://people.bu.edu/gilmore/nf-kb/target/index.html</a> |
| RAG1     | recombination activating gene 1                                                                                                                       | <a href="http://people.bu.edu/gilmore/nf-kb/target/index.html">http://people.bu.edu/gilmore/nf-kb/target/index.html</a> |
| P11      | 26 serine protease                                                                                                                                    | <a href="http://people.bu.edu/gilmore/nf-kb/target/index.html">http://people.bu.edu/gilmore/nf-kb/target/index.html</a> |
| TFEC     | transcription factor EC                                                                                                                               | <a href="http://people.bu.edu/gilmore/nf-kb/target/index.html">http://people.bu.edu/gilmore/nf-kb/target/index.html</a> |
| FCER2    | Fc fragment of IgE, low affinity II, receptor for (CD23A)                                                                                             | <a href="http://people.bu.edu/gilmore/nf-kb/target/index.html">http://people.bu.edu/gilmore/nf-kb/target/index.html</a> |
| MTHFR    | 5,10-methylenetetrahydrofolate reductase (NADPH)                                                                                                      | <a href="http://people.bu.edu/gilmore/nf-kb/target/index.html">http://people.bu.edu/gilmore/nf-kb/target/index.html</a> |
| PDYN     | prodynorphin                                                                                                                                          | <a href="http://people.bu.edu/gilmore/nf-kb/target/index.html">http://people.bu.edu/gilmore/nf-kb/target/index.html</a> |
| CD3G     | CD3G antigen, gamma polypeptide (T13 complex)                                                                                                         | <a href="http://people.bu.edu/gilmore/nf-kb/target/index.html">http://people.bu.edu/gilmore/nf-kb/target/index.html</a> |
| OXTR     | oxytocin receptor                                                                                                                                     | <a href="http://people.bu.edu/gilmore/nf-kb/target/index.html">http://people.bu.edu/gilmore/nf-kb/target/index.html</a> |
| IL11     | interleukin 11                                                                                                                                        | <a href="http://people.bu.edu/gilmore/nf-kb/target/index.html">http://people.bu.edu/gilmore/nf-kb/target/index.html</a> |
| LTA      | lymphotoxin alpha (TNF superfamily, member 1)                                                                                                         | <a href="http://people.bu.edu/gilmore/nf-kb/target/index.html">http://people.bu.edu/gilmore/nf-kb/target/index.html</a> |
| CCR5     | chemokine (C-C motif) receptor 5                                                                                                                      | <a href="http://people.bu.edu/gilmore/nf-kb/target/index.html">http://people.bu.edu/gilmore/nf-kb/target/index.html</a> |
| GIF      | gastric intrinsic factor (vitamin B synthesis)                                                                                                        | <a href="http://people.bu.edu/gilmore/nf-kb/target/index.html">http://people.bu.edu/gilmore/nf-kb/target/index.html</a> |
| CSF1     | colony stimulating factor 1 (macrophage)                                                                                                              | <a href="http://people.bu.edu/gilmore/nf-kb/target/index.html">http://people.bu.edu/gilmore/nf-kb/target/index.html</a> |
| IL12A    | interleukin 12A (natural killer cell stimulatory factor 1, cytotoxic lymphocyte maturation factor 1, p35)                                             | <a href="http://people.bu.edu/gilmore/nf-kb/target/index.html">http://people.bu.edu/gilmore/nf-kb/target/index.html</a> |
| CD80     | CD80 antigen (CD28 antigen ligand 1, B7-1 antigen)                                                                                                    | <a href="http://people.bu.edu/gilmore/nf-kb/target/index.html">http://people.bu.edu/gilmore/nf-kb/target/index.html</a> |
| TNIP1    | TNFAIP3 interacting protein 1                                                                                                                         | <a href="http://people.bu.edu/gilmore/nf-kb/target/index.html">http://people.bu.edu/gilmore/nf-kb/target/index.html</a> |
| EPO      | erythropoietin                                                                                                                                        | <a href="http://people.bu.edu/gilmore/nf-kb/target/index.html">http://people.bu.edu/gilmore/nf-kb/target/index.html</a> |
| LTB      | lymphotoxin beta (TNF superfamily, member 3)                                                                                                          | <a href="http://people.bu.edu/gilmore/nf-kb/target/index.html">http://people.bu.edu/gilmore/nf-kb/target/index.html</a> |
| CYP7B1   | cytochrome P450, family 7, subfamily B, polypeptide 1                                                                                                 | <a href="http://people.bu.edu/gilmore/nf-kb/target/index.html">http://people.bu.edu/gilmore/nf-kb/target/index.html</a> |
| IL10     | interleukin 10                                                                                                                                        | <a href="http://people.bu.edu/gilmore/nf-kb/target/index.html">http://people.bu.edu/gilmore/nf-kb/target/index.html</a> |
| NFKB2    | nuclear factor of kappa light polypeptide gene enhancer in B-cells 2 (p49/p100)                                                                       | <a href="http://people.bu.edu/gilmore/nf-kb/target/index.html">http://people.bu.edu/gilmore/nf-kb/target/index.html</a> |
| IL13     | interleukin 13                                                                                                                                        | <a href="http://people.bu.edu/gilmore/nf-kb/target/index.html">http://people.bu.edu/gilmore/nf-kb/target/index.html</a> |
| IL2      | interleukin 2                                                                                                                                         | <a href="http://people.bu.edu/gilmore/nf-kb/target/index.html">http://people.bu.edu/gilmore/nf-kb/target/index.html</a> |
| CXCL5    | chemokine (C-X-C motif) ligand 5                                                                                                                      | <a href="http://people.bu.edu/gilmore/nf-kb/target/index.html">http://people.bu.edu/gilmore/nf-kb/target/index.html</a> |
| CCL22    | chemokine (C-C motif) ligand 22                                                                                                                       | <a href="http://people.bu.edu/gilmore/nf-kb/target/index.html">http://people.bu.edu/gilmore/nf-kb/target/index.html</a> |
| MADCAM1  | mucosal vascular addressin cell adhesion molecule 1                                                                                                   | <a href="http://people.bu.edu/gilmore/nf-kb/target/index.html">http://people.bu.edu/gilmore/nf-kb/target/index.html</a> |
| REV3L    | REV3-like, catalytic subunit of DNA polymerase zeta (yeast)                                                                                           | <a href="http://people.bu.edu/gilmore/nf-kb/target/index.html">http://people.bu.edu/gilmore/nf-kb/target/index.html</a> |
| PTGS1    | prostaglandin 12 (prostaglycin) synthase                                                                                                              | <a href="http://people.bu.edu/gilmore/nf-kb/target/index.html">http://people.bu.edu/gilmore/nf-kb/target/index.html</a> |
| IL9      | interleukin 9                                                                                                                                         | <a href="http://people.bu.edu/gilmore/nf-kb/target/index.html">http://people.bu.edu/gilmore/nf-kb/target/index.html</a> |
| IL1A     | interleukin 1, alpha                                                                                                                                  | <a href="http://people.bu.edu/gilmore/nf-kb/target/index.html">http://people.bu.edu/gilmore/nf-kb/target/index.html</a> |
| KGR      | progesterone receptor                                                                                                                                 | <a href="http://people.bu.edu/gilmore/nf-kb/target/index.html">http://people.bu.edu/gilmore/nf-kb/target/index.html</a> |
| IRF7     | interferon regulatory factor 7                                                                                                                        | <a href="http://people.bu.edu/gilmore/nf-kb/target/index.html">http://people.bu.edu/gilmore/nf-kb/target/index.html</a> |
| FGF8     | fibroblast growth factor 8 (androgen-induced)                                                                                                         | <a href="http://people.bu.edu/gilmore/nf-kb/target/index.html">http://people.bu.edu/gilmore/nf-kb/target/index.html</a> |
| BAX      | BCL2-associated X protein                                                                                                                             | <a href="http://people.bu.edu/gilmore/nf-kb/target/index.html">http://people.bu.edu/gilmore/nf-kb/target/index.html</a> |
| ABCC6    | ATP-binding cassette, sub-family C (CFTR/MRP), member 6                                                                                               | <a href="http://people.bu.edu/gilmore/nf-kb/target/index.html">http://people.bu.edu/gilmore/nf-kb/target/index.html</a> |
| SERPINA2 | serpin peptidase inhibitor, clade A (alpha-1 antitrypsinase, antitrypsin), member 2                                                                   | <a href="http://people.bu.edu/gilmore/nf-kb/target/index.html">http://people.bu.edu/gilmore/nf-kb/target/index.html</a> |
| CND1     | cyclin D1                                                                                                                                             | <a href="http://people.bu.edu/gilmore/nf-kb/target/index.html">http://people.bu.edu/gilmore/nf-kb/target/index.html</a> |
| TAPP3    | TAP binding protein (tapasin)                                                                                                                         | <a href="http://people.bu.edu/gilmore/nf-kb/target/index.html">http://people.bu.edu/gilmore/nf-kb/target/index.html</a> |
| LIGALS3  | lectin, galactoside-binding, soluble 3 (galactin 3)                                                                                                   | <a href="http://people.bu.edu/gilmore/nf-kb/target/index.html">http://people.bu.edu/gilmore/nf-kb/target/index.html</a> |
| UCP2     | uncoupling protein 2 (mitochondrial, proton carrier)                                                                                                  | <a href="http://people.bu.edu/gilmore/nf-kb/target/index.html">http://people.bu.edu/gilmore/nf-kb/target/index.html</a> |
| PIM1     | pim-1 oncogene                                                                                                                                        | <a href="http://people.bu.edu/gilmore/nf-kb/target/index.html">http://people.bu.edu/gilmore/nf-kb/target/index.html</a> |
| GADD45B  | growth arrest and DNA-damage-inducible, beta                                                                                                          | <a href="http://people.bu.edu/gilmore/nf-kb/target/index.html">http://people.bu.edu/gilmore/nf-kb/target/index.html</a> |
| RIPK2    | receptor-interacting serine-threonine kinase 2                                                                                                        | <a href="http://people.bu.edu/gilmore/nf-kb/target/index.html">http://people.bu.edu/gilmore/nf-kb/target/index.html</a> |
| ADAM19   | ADAM metalloproteinase domain 19 (meltrin beta)                                                                                                       | <a href="http://people.bu.edu/gilmore/nf-kb/target/index.html">http://people.bu.edu/gilmore/nf-kb/target/index.html</a> |
| CD69     | CD69 antigen (p60, early T-cell activation antigen)                                                                                                   | <a href="http://people.bu.edu/gilmore/nf-kb/target/index.html">http://people.bu.edu/gilmore/nf-kb/target/index.html</a> |
| HGF      | hepatocyte growth factor (heparin-binding, scatter factor)                                                                                            | <a href="http://people.bu.edu/gilmore/nf-kb/target/index.html">http://people.bu.edu/gilmore/nf-kb/target/index.html</a> |
| ABCB1    | ATP-binding cassette, sub-family B (MDR/TAP), member 1                                                                                                | <a href="http://people.bu.edu/gilmore/nf-kb/target/index.html">http://people.bu.edu/gilmore/nf-kb/target/index.html</a> |
| UPK1B    | uroplakin 1B                                                                                                                                          | <a href="http://people.bu.edu/gilmore/nf-kb/target/index.html">http://people.bu.edu/gilmore/nf-kb/target/index.html</a> |
| CCL11    | chemokine (C-C motif) ligand 11                                                                                                                       | <a href="http://people.bu.edu/gilmore/nf-kb/target/index.html">http://people.bu.edu/gilmore/nf-kb/target/index.html</a> |
| CXCL11   | chemokine (C-X-C motif) ligand 11                                                                                                                     | <a href="http://people.bu.edu/gilmore/nf-kb/target/index.html">http://people.bu.edu/gilmore/nf-kb/target/index.html</a> |
| GZMB     | granzyme B (granzyme 2, cytotoxic T-lymphocyte-associated serine esterase 1)                                                                          | <a href="http://people.bu.edu/gilmore/nf-kb/target/index.html">http://people.bu.edu/gilmore/nf-kb/target/index.html</a> |
| XDH      | xanthine dehydrogenase                                                                                                                                | <a href="http://people.bu.edu/gilmore/nf-kb/target/index.html">http://people.bu.edu/gilmore/nf-kb/target/index.html</a> |
| IFNG     | interferon, gamma                                                                                                                                     | <a href="http://people.bu.edu/gilmore/nf-kb/target/index.html">http://people.bu.edu/gilmore/nf-kb/target/index.html</a> |
| ICOS     | inducible T-cell co-stimulator                                                                                                                        | <a href="http://people.bu.edu/gilmore/nf-kb/target/index.html">http://people.bu.edu/gilmore/nf-kb/target/index.html</a> |

|        |                                                                                                                |                                                                                                                         |
|--------|----------------------------------------------------------------------------------------------------------------|-------------------------------------------------------------------------------------------------------------------------|
| FN1    | fibronectin 1                                                                                                  | <a href="http://people.bu.edu/gilmore/nf-kb/target/index.html">http://people.bu.edu/gilmore/nf-kb/target/index.html</a> |
| ERBB2  | v-erb-b2 erythroblastic leukemia viral oncogene homolog 2, neuro/glioblastoma derived oncogene homolog (avian) | <a href="http://people.bu.edu/gilmore/nf-kb/target/index.html">http://people.bu.edu/gilmore/nf-kb/target/index.html</a> |
| KITLG  | KIT ligand                                                                                                     | <a href="http://people.bu.edu/gilmore/nf-kb/target/index.html">http://people.bu.edu/gilmore/nf-kb/target/index.html</a> |
| FASLG  | Fas ligand (TNF superfamily, member 6)                                                                         | <a href="http://people.bu.edu/gilmore/nf-kb/target/index.html">http://people.bu.edu/gilmore/nf-kb/target/index.html</a> |
| HLA-G  | HLA-G histocompatibility antigen, class I, G                                                                   | <a href="http://people.bu.edu/gilmore/nf-kb/target/index.html">http://people.bu.edu/gilmore/nf-kb/target/index.html</a> |
| TGM2   | transglutaminase 2 (C polypeptide, protein-glutamine-gamma-glutamyltransferase)                                | <a href="http://people.bu.edu/gilmore/nf-kb/target/index.html">http://people.bu.edu/gilmore/nf-kb/target/index.html</a> |
| NR3C1  | nuclear receptor subfamily 3, group C, member 1 (glucocorticoid receptor)                                      | <a href="http://people.bu.edu/gilmore/nf-kb/target/index.html">http://people.bu.edu/gilmore/nf-kb/target/index.html</a> |
| PENK   | proenkephalin                                                                                                  | <a href="http://people.bu.edu/gilmore/nf-kb/target/index.html">http://people.bu.edu/gilmore/nf-kb/target/index.html</a> |
| PAX8   | paired box gene 8                                                                                              | <a href="http://people.bu.edu/gilmore/nf-kb/target/index.html">http://people.bu.edu/gilmore/nf-kb/target/index.html</a> |
| CCL2   | chemokine (C-C motif) ligand 2                                                                                 | <a href="http://people.bu.edu/gilmore/nf-kb/target/index.html">http://people.bu.edu/gilmore/nf-kb/target/index.html</a> |
| S100A6 | S100 calcium binding protein A6 (calyculin)                                                                    | <a href="http://people.bu.edu/gilmore/nf-kb/target/index.html">http://people.bu.edu/gilmore/nf-kb/target/index.html</a> |
| EDN1   | endothelin 1                                                                                                   | <a href="http://people.bu.edu/gilmore/nf-kb/target/index.html">http://people.bu.edu/gilmore/nf-kb/target/index.html</a> |
| HPS2   | heparanase                                                                                                     | <a href="http://people.bu.edu/gilmore/nf-kb/target/index.html">http://people.bu.edu/gilmore/nf-kb/target/index.html</a> |
| SNAI1  | snail homolog 1 (Drosophila)                                                                                   | <a href="http://people.bu.edu/gilmore/nf-kb/target/index.html">http://people.bu.edu/gilmore/nf-kb/target/index.html</a> |
| KCNK5  | potassium channel, subfamily K, member 5                                                                       | <a href="http://people.bu.edu/gilmore/nf-kb/target/index.html">http://people.bu.edu/gilmore/nf-kb/target/index.html</a> |
| ABCG5  | ATP-binding cassette, sub-family G (WHITE), member 5 (sterolin 1)                                              | <a href="http://people.bu.edu/gilmore/nf-kb/target/index.html">http://people.bu.edu/gilmore/nf-kb/target/index.html</a> |
| F11R   | F11 receptor                                                                                                   | <a href="http://people.bu.edu/gilmore/nf-kb/target/index.html">http://people.bu.edu/gilmore/nf-kb/target/index.html</a> |
| G6PD   | glucose-6-phosphate dehydrogenase                                                                              | <a href="http://people.bu.edu/gilmore/nf-kb/target/index.html">http://people.bu.edu/gilmore/nf-kb/target/index.html</a> |
| ORM1   | orosomucoid 1                                                                                                  | <a href="http://people.bu.edu/gilmore/nf-kb/target/index.html">http://people.bu.edu/gilmore/nf-kb/target/index.html</a> |
| ADORA1 | adenosine A1 receptor                                                                                          | <a href="http://people.bu.edu/gilmore/nf-kb/target/index.html">http://people.bu.edu/gilmore/nf-kb/target/index.html</a> |
| C4BPA  | complement component 4 binding protein, alpha                                                                  | <a href="http://people.bu.edu/gilmore/nf-kb/target/index.html">http://people.bu.edu/gilmore/nf-kb/target/index.html</a> |
| HAS1   | hyaluronan synthase 1                                                                                          | <a href="http://people.bu.edu/gilmore/nf-kb/target/index.html">http://people.bu.edu/gilmore/nf-kb/target/index.html</a> |
| REL    | v-rel reticuloendotheliosis viral oncogene homolog (avian)                                                     | <a href="http://people.bu.edu/gilmore/nf-kb/target/index.html">http://people.bu.edu/gilmore/nf-kb/target/index.html</a> |
| CCL3   | chemokine (C-C motif) ligand 3                                                                                 | <a href="http://people.bu.edu/gilmore/nf-kb/target/index.html">http://people.bu.edu/gilmore/nf-kb/target/index.html</a> |
| CCL4   | chemokine (C-C motif) ligand 4                                                                                 | <a href="http://people.bu.edu/gilmore/nf-kb/target/index.html">http://people.bu.edu/gilmore/nf-kb/target/index.html</a> |
| CLAR   | CASP8 and FADD-like apoptosis regulator                                                                        | <a href="http://people.bu.edu/gilmore/nf-kb/target/index.html">http://people.bu.edu/gilmore/nf-kb/target/index.html</a> |
| PRF1   | perforin 1 (pore forming protein)                                                                              | <a href="http://people.bu.edu/gilmore/nf-kb/target/index.html">http://people.bu.edu/gilmore/nf-kb/target/index.html</a> |
| HBE1   | hemoglobin, epsilon 1                                                                                          | <a href="http://people.bu.edu/gilmore/nf-kb/target/index.html">http://people.bu.edu/gilmore/nf-kb/target/index.html</a> |
| C4A    | complement component 4A                                                                                        | <a href="http://people.bu.edu/gilmore/nf-kb/target/index.html">http://people.bu.edu/gilmore/nf-kb/target/index.html</a> |
| OLR1   | oxidised low density lipoprotein (lectin-like) receptor 1                                                      | <a href="http://people.bu.edu/gilmore/nf-kb/target/index.html">http://people.bu.edu/gilmore/nf-kb/target/index.html</a> |
| AGT    | angiotensinogen (serpin peptidase inhibitor, clade A, member 8)                                                | <a href="http://people.bu.edu/gilmore/nf-kb/target/index.html">http://people.bu.edu/gilmore/nf-kb/target/index.html</a> |

Table S2.

Leading edge core set of NF- $\kappa$ B target genes, which are differentially enriched in MALT lymphoma with t(11;18) vs. no translocation

| Rank                                                                        | Gene         | Description                                                             | Chromosome Band | Entrez ID | Signal to noise ratio | Enrichment Score |
|-----------------------------------------------------------------------------|--------------|-------------------------------------------------------------------------|-----------------|-----------|-----------------------|------------------|
| <b>Expression of genes enriched in translocation negative MALT lymphoma</b> |              |                                                                         |                 |           |                       |                  |
| 1                                                                           | PLAU         | plasminogen activator, urokinase                                        | 10q24           | 5328      | 0.759                 | 0.018            |
| 2                                                                           | PTGS2        | prostaglandin-endoperoxide synthase 2 (prostaglandin G/H synthase)      | 1q25.2-q25.3    | 5743      | 0.714                 | 0.034            |
| 3                                                                           | NR4A3        | nuclear receptor subfamily 4, group A, member 3                         | 9q22            | 8013      | 0.687                 | 0.050            |
| 4                                                                           | IL8          | interleukin 8                                                           | 4q13-q21        | 3576      | 0.670                 | 0.065            |
| 5                                                                           | CXCL2        | chemokine (C-X-C motif) ligand 2                                        | 4q21            | 2920      | 0.658                 | 0.080            |
| 6                                                                           | CXCL1        | chemokine (C-X-C motif) ligand 1 (melanoma growth stimulating a         | 4q21            | 2919      | 0.597                 | 0.092            |
| 7                                                                           | DEFB4        | defensin, beta 4                                                        | 8p23.1-p22      | 1673      | 0.562                 | 0.104            |
| 8                                                                           | CXCL5        | chemokine (C-X-C motif) ligand 5                                        | 4q12-q13        | 6374      | 0.527                 | 0.113            |
| 9                                                                           | CD86         | CD86 molecule                                                           | 3q21            | 942       | 0.497                 | 0.120            |
| 10                                                                          | BDKRB1       | bradykinin receptor B1                                                  | 14q32.1-q32.2   | 623       | 0.475                 | 0.127            |
| 11                                                                          | CCL2         | chemokine (C-C motif) ligand 2                                          | 17q11.2-q12     | 6347      | 0.469                 | 0.137            |
| 12                                                                          | ICOS         | inducible T-cell co-stimulator                                          | 2q33            | 29851     | 0.455                 | 0.145            |
| 13                                                                          | IL1RN        | interleukin 1 receptor antagonist                                       | 2q14.2          | 3557      | 0.451                 | 0.155            |
| 14                                                                          | SDC4         | syndecan 4                                                              | 20q12           | 6385      | 0.448                 | 0.165            |
| 15                                                                          | IL1B         | interleukin 1, beta                                                     | 2q14            | 3553      | 0.433                 | 0.172            |
| 16                                                                          | MMP3         | matrix metalloproteinase 3 (stromelysin 1, progelatinase)               | 11q22.3         | 4314      | 0.416                 | 0.176            |
| 17                                                                          | NR4A2        | nuclear receptor subfamily 4, group A, member 2                         | 2q22-q23        | 4929      | 0.401                 | 0.180            |
| 18                                                                          | PTAFR        | platelet-activating factor receptor                                     | 1p35-p34.3      | 5724      | 0.393                 | 0.185            |
| 19                                                                          | CYP7B1       | cytochrome P450, family 7, subfamily B, polypeptide 1                   | 8q21.3          | 9420      | 0.393                 | 0.194            |
| 20                                                                          | TLR2         | toll-like receptor 2                                                    | 4q32            | 7097      | 0.384                 | 0.198            |
| 21                                                                          | IGFBP2       | insulin-like growth factor binding protein 2, 36kDa                     | 2q33-q34        | 3485      | 0.379                 | 0.206            |
| 22                                                                          | SOD2         | superoxide dismutase 2, mitochondrial                                   | 6q25.3          | 6648      | 0.376                 | 0.213            |
| 23                                                                          | TFF3         | trefoil factor 3 (intestinal)                                           | 21q22.3         | 7033      | 0.376                 | 0.222            |
| 24                                                                          | DIO2         | deiodinase, iodothyronine, type II                                      | 14q24.2-q24.3   | 1734      | 0.366                 | 0.226            |
| 25                                                                          | <b>CCND1</b> | <b>cyclin D1</b>                                                        | 11q13           | 595       | 0.364                 | 0.233            |
| 26                                                                          | FCER2        | Fc fragment of IgE, low affinity II, receptor for (CD23)                | 19p13.3         | 2208      | 0.362                 | 0.240            |
| 27                                                                          | GADD45B      | growth arrest and DNA-damage-inducible, beta                            | 19p13.3         | 4616      | 0.354                 | 0.244            |
| 28                                                                          | TNC          | tenascin C                                                              | 9q33            | 3371      | 0.351                 | 0.251            |
| 29                                                                          | GZMB         | granzyme B (granzyme 2, cytotoxic T-lymphocyte-associated serine        | 14q11.2         | 3002      | 0.351                 | 0.259            |
| 30                                                                          | PTGIS        | prostaglandin I2 (prostacyclin) synthase                                | 20q13.13        | 5740      | 0.344                 | 0.264            |
| 31                                                                          | PAX8         | paired box 8                                                            | 2q12-q14        | 7849      | 0.324                 | 0.258            |
| 32                                                                          | SERPINA1     | serpin peptidase inhibitor, clade A (alpha-1 antiproteinase, antitryps  | 14q32.1         | 5265      | 0.322                 | 0.264            |
| 33                                                                          | PTX3         | pentraxin-related gene, rapidly induced by IL-1 beta                    | 3q25            | 5806      | 0.321                 | 0.271            |
| 34                                                                          | BMP2         | bone morphogenetic protein 2                                            | 20p12           | 650       | 0.306                 | 0.268            |
| 35                                                                          | PENK         | proenkephalin                                                           | 8q23-q24        | 5179      | 0.305                 | 0.274            |
| 36                                                                          | CCL11        | chemokine (C-C motif) ligand 11                                         | 17q21.1-q21.2   | 6356      | 0.291                 | 0.269            |
| 37                                                                          | KITLG        | KIT ligand                                                              | 12q22           | 4254      | 0.29                  | 0.274            |
| 38                                                                          | BGN          | biglycan                                                                | Xq28            | 633       | 0.288                 | 0.278            |
| 39                                                                          | ADH1A        | alcohol dehydrogenase 1A (class I), alpha polypeptide                   | 4q21-q23        | 124       | 0.275                 | 0.273            |
| 40                                                                          | IL11         | interleukin 11                                                          | 19q13.3-q13.4   | 3589      | 0.272                 | 0.276            |
| 41                                                                          | EGFR         | epidermal growth factor receptor (erythroblastic leukemia viral (v-e    | 7p12            | 1956      | 0.272                 | 0.282            |
| 42                                                                          | TEAD1        | TEA domain family member 1 (SV40 transcriptional enhancer fact          | 11p15.2         | 7003      | 0.272                 | 0.288            |
| 43                                                                          | THBS2        | thrombospondin 2                                                        | 6q27            | 7058      | 0.266                 | 0.289            |
| 44                                                                          | FAS          | Fas (TNF receptor superfamily, member 6)                                | 10q24.1         | 355       | 0.264                 | 0.294            |
| 45                                                                          | APOC3        | apolipoprotein C-III                                                    | 11q23.1-q23.2   | 345       | 0.247                 | 0.279            |
| 46                                                                          | CCL22        | chemokine (C-C motif) ligand 22                                         | 16q13           | 6367      | 0.245                 | 0.284            |
| 47                                                                          | IL13         | interleukin 13                                                          | 5q31            | 3596      | 0.239                 | 0.282            |
| 48                                                                          | KCNK5        | potassium channel, subfamily K, member 5                                | 6p21            | 8645      | 0.237                 | 0.286            |
| 49                                                                          | ELF3         | E74-like factor 3 (ets domain transcription factor, epithelial-specific | 1q32.2          | 1999      | 0.23                  | 0.282            |
| 50                                                                          | TNFRSF9      | tumor necrosis factor receptor superfamily, member 9                    | 1p36            | 3604      | 0.229                 | 0.286            |
| 51                                                                          | HPSE         | heparanase                                                              | 4q21.3          | 10855     | 0.228                 | 0.29             |
| 52                                                                          | IER3         | immediate early response 3                                              | 6p21.3          | 8870      | 0.224                 | 0.292            |
| 53                                                                          | AKR1C2       | aldo-keto reductase family 1, member C2 (dihydrodiol dehydrogena        | 10p15-p14       | 1646      | 0.224                 | 0.298            |
| 54                                                                          | PLK3         | polo-like kinase 3 (Drosophila)                                         | 1p34.1          | 1263      | 0.22                  | 0.298            |
| 55                                                                          | BCL2L1       | BCL2-like 1                                                             | 20q11.21        | 598       | 0.214                 | 0.295            |
| 56                                                                          | FN1          | fibronectin 1                                                           | 2q34            | 2335      | 0.212                 | 0.298            |
| 57                                                                          | UPP1         | uridine phosphorylase 1                                                 | 7p12.3          | 7378      | 0.21                  | 0.299            |
| 58                                                                          | GBP1         | guanylate binding protein 1, interferon-inducible, 67kDa                | 1p22.2          | 2633      | 0.208                 | 0.302            |
| 59                                                                          | UBE2M        | ubiquitin-conjugating enzyme E2M (UBC12 homolog, yeast)                 | 19q13.43        | 9040      | 0.205                 | 0.302            |
| 60                                                                          | JUNB         | jun B proto-oncogene                                                    | 19p13.2         | 3726      | 0.203                 | 0.304            |
| 61                                                                          | PIM1         | pim-1 oncogene                                                          | 6p21.2          | 5292      | 0.203                 | 0.309            |
| 62                                                                          | BNIP3        | BCL2/adenovirus E1B 19kDa interacting protein 3                         | 10q26.3         | 664       | 0.201                 | 0.312            |

**Expression of genes enriched in translocation positive MALT lymphoma**

|     |                 |                                                                          |               |       |         |           |
|-----|-----------------|--------------------------------------------------------------------------|---------------|-------|---------|-----------|
| 94  | <b>TNFSF13B</b> | tumor necrosis factor (ligand) superfamily, member 13b                   | 13q32-q34     | 10673 | 0.066   | 0.208     |
| 95  | BCL3            | B-cell CLL/lymphoma 3                                                    | 19q13.1-q13.2 | 602   | 0.064   | 0.205     |
| 96  | SUV39H1         | suppressor of variegation 3-9 homolog 1 (Drosophila)                     | Xp11.23       | 6839  | 0.062   | 0.204     |
| 97  | TP53            | tumor protein p53                                                        | 17p13.1       | 7157  | 0.045   | 0.175     |
| 98  | UPK1B           | uroplakin 1B                                                             | 3q13.3-q21    | 7348  | 0.040   | 0.169     |
| 99  | BACE2           | beta-site APP-cleaving enzyme 2                                          | 21q22.3       | 25825 | 0.030   | 0.150     |
| 100 | CYP2E1          | cytochrome P450, family 2, subfamily E, polypeptide 1                    | 10q24.3-qter  | 1571  | 0.027   | 0.147     |
| 101 | IL15RA          | interleukin 15 receptor, alpha                                           | 10p15-p14     | 3601  | 0.027   | 0.147     |
| 102 | KLF10           | Kruppel-like factor 10                                                   | 8q22.2        | 7071  | 0.026   | 0.146     |
| 103 | ABCB1           | ATP-binding cassette, sub-family B (MDR/TAP), member 1                   | 7q21.12       | 5243  | 0.021   | 0.139     |
| 104 | IL2RA           | interleukin 2 receptor, alpha                                            | 10p15-p14     | 3559  | 0.013   | 0.125     |
| 105 | CD83            | CD83 molecule                                                            | 6p23          | 9308  | 0.006   | 0.112     |
| 106 | MMP9            | matrix metalloproteinase 9 (gelatinase B, 92kDa gelatinase, 92kDa t      | 20q11.2-q13.1 | 4318  | -0.011  | 0.082     |
| 107 | PGK1            | phosphoglycerate kinase 1                                                | Xq13          | 5230  | -0.013  | 0.079     |
| 108 | <b>PIM2</b>     | <b>pim-2 oncogene</b>                                                    | Xp11.23       | 11040 | -0.015  | 0.077     |
| 109 | CD80            | CD80 molecule                                                            | 3q13.3-q21    | 941   | -0.016  | 0.076     |
| 110 | BAX             | BCL2-associated X protein                                                | 19q13.3-q13.4 | 581   | -0.019  | 0.071     |
| 111 | C4BPA           | complement component 4 binding protein, alpha                            | 1q32          | 722   | -0.020  | 0.069     |
| 112 | ENG             | endoglin                                                                 | 9q33-q34.1    | 2022  | -0.023  | 0.066     |
| 113 | AGER            | advanced glycosylation end product-specific receptor                     | 6p21.3        | 177   | -0.027  | 0.0593    |
| 114 | OLR1            | oxidized low density lipoprotein (lectin-like) receptor 1                | 12p13.2-p12.3 | 4973  | -0.0325 | 0.0499    |
| 115 | HMOX1           | heme oxygenase (decycling) 1                                             | 22q12         | 3162  | -0.0349 | 0.0477    |
| 116 | ENO2            | enolase 2 (gamma, neuronal)                                              | 12p13         | 2026  | -0.0369 | 0.0447    |
| 117 | IL15            | interleukin 15                                                           | 4q31          | 3600  | -0.0438 | 0.0351    |
| 118 | SELP            | selectin P (granule membrane protein 140kDa, antigen CD62)               | 1q22-q25      | 6403  | -0.0479 | 0.0293    |
| 119 | <b>CXCL13</b>   | <b>chemokine (C-X-C motif) ligand 13</b>                                 | 4q21          | 10563 | -0.0497 | 0.0271    |
| 120 | <b>TNFSF11</b>  | <b>tumor necrosis factor (ligand) superfamily, member 11</b>             | 13q14         | 8600  | -0.0521 | 0.0243    |
| 121 | TNFAIP3         | tumor necrosis factor, alpha-induced protein 3                           | 6q23          | 7128  | -0.0572 | 0.0185    |
| 122 | CFLAR           | CASP8 and FADD-like apoptosis regulator                                  | 2q33-q34      | 8837  | -0.0588 | 0.018     |
| 123 | APOE            | apolipoprotein E                                                         | 19q13.2       | 348   | -0.0591 | 0.0187    |
| 124 | CCL5            | chemokine (C-C motif) ligand 5                                           | 17q11.2-q12   | 6352  | -0.0606 | 0.0175    |
| 125 | IL32            | interleukin 32                                                           | 16p13.3       | 9235  | -0.0716 | 0.000704  |
| 126 | IL6             | interleukin 6 (interferon, beta 2)                                       | 7p21          | 3569  | -0.0733 | -0.000587 |
| 127 | <b>CXCL9</b>    | <b>chemokine (C-X-C motif) ligand 9</b>                                  | 4q21          | 4283  | -0.0835 | -0.0169   |
| 128 | <b>MADCAM1</b>  | <b>mucosal vascular addressin cell adhesion molecule 1</b>               | 19p13.3       | 8174  | -0.0837 | -0.0151   |
| 129 | NFKB1           | nuclear factor of kappa light polypeptide gene enhancer in B-cells 1     | 4q24          | 4790  | -0.0842 | -0.0138   |
| 130 | CCND3           | cyclin D3                                                                | 6p21          | 896   | -0.086  | -0.0144   |
| 131 | GCLC            | glutamate-cysteine ligase, catalytic subunit                             | 6p12          | 2729  | -0.0932 | -0.0226   |
| 132 | BLR1            | CXCR5 (Chemotactic cytokine) 5                                           | 11q23.3       | 643   | -0.102  | -0.0357   |
| 133 | CTSB            | cathepsin B                                                              | 8p22          | 1508  | -0.107  | -0.0403   |
| 134 | CD3G            | CD3g molecule, gamma (CD3-TCR complex)                                   | 11q23         | 917   | -0.114  | -0.0476   |
| 135 | MYC             | v-myc myelocytomatosis viral oncogene homolog (avian)                    | 8q24.21       | 4609  | -0.117  | -0.0509   |
| 136 | CCR5            | chemokine (C-C motif) receptor 5                                         | 3p21.31       | 1234  | -0.122  | -0.0555   |
| 137 | RELB            | v-rel reticuloendotheliosis viral oncogene homolog B                     | 19q13.32      | 5971  | -0.124  | -0.0565   |
| 138 | GCLM            | glutamate-cysteine ligase, modifier subunit                              | 1p22.1        | 2730  | -0.132  | -0.0646   |
| 139 | STAT5A          | signal transducer and activator of transcription 5A                      | 17q11.2       | 6776  | -0.141  | -0.0746   |
| 140 | <b>CXCL12</b>   | <b>chemokine (C-X-C motif) ligand 12 (stromal cell-derived factor 1)</b> | 10q11.1       | 6387  | -0.142  | -0.0718   |
| 141 | TNFRSF10B       | tumor necrosis factor receptor superfamily, member 10b                   | 8p22-p21      | 8795  | -0.145  | -0.0732   |
| 142 | PTGDS           | prostaglandin D2 synthase 21kDa (brain)                                  | 9q34.2-q34.3  | 5730  | -0.15   | -0.0784   |
| 143 | KLK3            | kallikrein-related peptidase 3                                           | 19q13.41      | 354   | -0.167  | -0.0961   |
| 144 | TPMT            | thiopurine S-methyltransferase                                           | 6p22.3        | 7172  | -0.172  | -0.0992   |
| 145 | VCAM1           | vascular cell adhesion molecule 1                                        | 1p32-p31      | 7412  | -0.175  | -0.0986   |
| 146 | TNF             | tumor necrosis factor (TNF superfamily, member 2)                        | 6p21.3        | 7124  | -0.182  | -0.105    |
| 147 | CCL14           | chemokine (C-C motif) ligand 14                                          | 17q12         | 6358  | -0.186  | -0.103    |
| 148 | CD74            | CD74 molecule, major histocompatibility complex, class II invariant      | 5q32          | 972   | -0.188  | -0.101    |
| 149 | ADAM19          | ADAM metalloproteinase domain 19 (meltrin beta)                          | 5q32-q33      | 8728  | -0.19   | -0.0977   |
| 150 | CXCL10          | chemokine (C-X-C motif) ligand 10                                        | 4q21          | 3627  | -0.203  | -0.106    |
| 151 | UCP2            | uncoupling protein 2 (mitochondrial, proton carrier)                     | 11q13         | 7351  | -0.205  | -0.103    |
| 152 | CD44            | CD44 molecule (Indian blood group)                                       | 11p13         | 960   | -0.209  | -0.101    |
| 153 | <b>BCL2A1</b>   | <b>BCL2-related protein A1</b>                                           | 15q24.3       | 597   | -0.22   | -0.108    |
| 154 | CD48            | CD48 molecule                                                            | 1q21.3-q22    | 962   | -0.239  | -0.124    |
| 155 | NR3C1           | nuclear receptor subfamily 3, group C, member 1 (glucocorticoid re       | 5q31.3        | 2908  | -0.243  | -0.121    |
| 156 | BCL10           | B-cell CLL/lymphoma 10                                                   | 1p22          | 8915  | -0.292  | -0.153    |
| 157 | <b>IRF3</b>     | <b>interferon regulatory factor 3</b>                                    | 19q13.3-q13.4 | 3661  | -0.294  | -0.147    |
| 158 | MAP4K1          | mitogen-activated protein kinase kinase kinase 1                         | 19q13.1-q13.4 | 11184 | -0.302  | -0.145    |
| 159 | CD40            | CD40 molecule, TNF receptor superfamily member 5                         | 20q12-q13.2   | 958   | -0.307  | -0.141    |

|     |         |                                                                       |              |        |        |           |
|-----|---------|-----------------------------------------------------------------------|--------------|--------|--------|-----------|
| 160 | CCL21   | chemokine (C-C motif) ligand 21                                       | 9p13         | 6366   | -0.335 | -0.15     |
| 161 | CCL19   | chemokine (C-C motif) ligand 19                                       | 9p13         | 6363   | -0.336 | -0.143    |
| 162 | IFI44L  | interferon-induced protein 44-like                                    | 1p31.1       | 10964  | -0.354 | -0.144    |
| 163 | CXCR4   | chemokine (C-X-C motif) receptor 4                                    | 2q21         | 7852   | -0.362 | -0.14     |
| 164 | PRDM2   | PR domain containing 2, with ZNF domain                               | 1p36.21      | 7799   | -0.414 | -0.147    |
| 165 | REL     | v-rel reticuloendotheliosis viral oncogene homolog (avian)            | 2p13-p12     | 5966   | -0.422 | -0.139    |
| 166 | IRF2    | interferon regulatory factor 2                                        | 4q34.1-q35.1 | 3660   | -0.425 | -0.13     |
| 167 | MX1     | myxovirus (influenza virus) resistance 1, interferon-inducible protei | 21q22.3      | 4599   | -0.428 | -0.121    |
| 168 | LTB     | lymphotoxin beta (TNF superfamily, member 3)                          | 6p21.3       | 4050   | -0.438 | -0.114    |
| 169 | IRF7    | interferon regulatory factor 7                                        | 11p15.5      | 3665   | -0.452 | -0.106    |
| 170 | TLR6    | toll-like receptor 6                                                  | 4p14         | 10333  | -0.453 | -0.0952   |
| 171 | BCL2    | B-cell CLL/lymphoma 2                                                 | 18q21.3      | 596    | -0.462 | -0.0858   |
| 172 | BCL2L10 | BCL2-like 10 (apoptosis facilitator)                                  | 15q21        | 10017  | -0.463 | -0.0751   |
| 173 | CCR7    | chemokine (C-C motif) receptor 7                                      | 17q12-q21.2  | 1236   | -0.483 | -0.0667   |
| 174 | IRF4    | interferon regulatory factor 4                                        | 6p25-p23     | 3662   | -0.491 | -0.0557   |
| 175 | CCR2B   | chemokine (C-C motif) receptor 2 isoform B                            | 3p21.31      | 729230 | -0.526 | -0.0479   |
| 176 | TFEC    | transcription factor EC                                               | 7q31.2       | 22797  | -0.67  | -0.0404   |
| 177 | CD69    | CD69 molecule                                                         | 12p13-p12    | 969    | -0.717 | -0.0252   |
| 178 | CCR2A   | chemokine (C-C motif) receptor 2 isoform A                            | 3p21.31      | 729230 | -1.13  | -0.000728 |



**SUPPLEMENTARY TABLE LEGENDS**

**Table S1.** NF- $\kappa$ B target genes. Genes were collated from an online data base (<http://www.NF-kB.org>) published works (<http://bioinfo.lifl.fr/NF-KB>, <http://people.bu.edu/gilmore/nf-kb/target/index.html>), and careful bioinformatic search. Noncanonical NF- $\kappa$ B target genes (highlighted in yellow) were identified according to previous investigations (11, 14-21).

**Table S2.** Leading edge core set of NF- $\kappa$ B target genes that are differentially enriched in MALT lymphomas with t(11;18) vs. no translocation. Noncanonical NF- $\kappa$ B target genes (11, 14-21) are highlighted in yellow.

**SUPPLEMENTARY REFERENCES**

1. P. C. Lucas *et al.*, *Oncogene* **26**, 5643 (2007).
2. P. C. Lucas *et al.*, *J Biol Chem* **276**, 19012 (2001).
3. P. G. Isaacson, M. Q. Du, *Nat Rev Cancer* **4**, 644 (2004).
4. L. M. McAllister-Lucas *et al.*, *J Biol Chem* **276**, 30589 (2001).
5. H. Noels *et al.*, *J Biol Chem* **282**, 10180 (2007).
6. F. Q. An *et al.*, *J Biol Chem* **280**, 3862 (2005).
7. D. Sanchez-Izquierdo *et al.*, *Blood* **101**, 4539 (2003).
8. P. Sideras *et al.*, *Int Immunol* **1**, 631 (1989).
9. H. Ye *et al.*, *J Pathol* **205**, 293 (2005).
10. D. Beckett, E. Kovaleva, P. J. Schatz, *Protein Sci* **8**, 921 (1999).
11. T. Enzler *et al.*, *Immunity* **25**, 403 (2006).
12. T. T. Lu, J. G. Cyster, *Science* **297**, 409 (2002).
13. R. A. Hamoudi *et al.*, *Leukemia* **24**, 1487.
14. G. Bonizzi *et al.*, *Embo J* **23**, 4202 (2004).
15. J. L. Chen, A. Limnander, P. B. Rothman, *Blood* **111**, 1677 (2008).
16. D. L. Drayton *et al.*, *J Immunol* **173**, 6161 (2004).
17. F. Guo, D. Weih, E. Meier, F. Weih, *Blood* **110**, 2381 (2007).
18. M. Luftig *et al.*, *Proc Natl Acad Sci U S A* **101**, 141 (2004).
19. U. Senftleben *et al.*, *Science* **293**, 1495 (2001).
20. R. T. Woodland *et al.*, *Blood* **111**, 750 (2008).
21. J. Zhang, M. A. Warren, S. F. Shoemaker, M. M. Ip, *Endocrinology* **148**, 268 (2007).
22. X. Sagaert *et al.*, *Mod Pathol* **23**, 458.
23. S. Lopez-Giral *et al.*, *J Leukoc Biol* **76**, 462 (2004).
24. Y. Nie *et al.*, *J Exp Med* **200**, 1145 (2004).
25. U. Ferch *et al.*, *Nat Immunol* **8**, 984 (2007).
26. G. Xiao, S. C. Sun, *J Biol Chem* **275**, 21081 (2000).
27. G. Liao, M. Zhang, E. W. Harhaj, S.-C. Sun, *J Biol Chem* **279**, 26243 (2004).
